1 **The human ribosomal RNA gene is composed of highly homogenized tandem clusters**

2

3 **Running title: The human rDNA is quite regular**

4

5 Yutaro Hori<sup>1</sup>, Akira Shimamoto<sup>2</sup>, Takehiko Kobayashi<sup>1,3</sup>

6

7 1 Institute for Quantitative Biosciences, the University of Tokyo, Tokyo, Japan

8 2 Faculty of Pharmaceutical Sciences, Sanyo-Onoda City University, Sanyo Onoda, Yamaguchi, Japan

9 3 Corresponding to tako2015 @iqb.u-tokyo.ac.jp

10

11 Key words: ribosomal RNA gene (rDNA), rDNA copy number, DNA methylation, senescence, genome

12 instability, human, mutation rate, Oxford Nanopore sequencer, gene conversion, homogenization, progeroid

13 syndrome

14

15 **ABSTRACT**

16 The structure of the human ribosomal RNA gene clustering region (rDNA) has traditionally been hard to  
17 analyze due to its highly repetitive nature. However, the recent development of long-read sequencing  
18 technology, such as Oxford Nanopore sequencing, has enabled us to approach the large-scale structure of the  
19 genome. Using this technology, we found that human cells have a quite regular rDNA structure. Although  
20 each human rDNA copy has some variations in its non-coding region, contiguous copies of rDNA are  
21 similar, suggesting that homogenization through gene conversion frequently occurs between copies. Analysis  
22 of rDNA methylation by Nanopore sequencing further showed that all of the non-coding regions are heavily  
23 methylated, whereas about half of the coding regions are clearly unmethylated. The ratio of unmethylated  
24 copies, which are speculated to be transcriptionally active, was lower in individuals with a higher rDNA  
25 copy number, suggesting that there is a mechanism that keeps the active copy number stable. Lastly, the  
26 rDNA in progeroid syndrome patient cells with reduced DNA repair activity had more unstable copies as  
27 compared with control normal cells, although the rate was much lower than previously reported using a Fiber  
28 FISH method. Collectively, our results alter the view of rDNA stability and transcription regulation in human  
29 cells, indicating the presence of mechanisms for both homogenization to ensure sequence quality and  
30 maintenance of active copies for cellular functions.

31

## 32 INTRODUCTION

33 The ribosomal RNA gene (rDNA) is the most abundant repetitive gene in eukaryotic cells. In the  
34 budding yeast *Saccharomyces cerevisiae*, the structure and function of rDNA have been well studied,  
35 establishing rDNA as a unique region in the genome. Each unit (9.2 kb) of rDNA includes two coding  
36 regions, 35S precursor ribosomal RNA (rRNA) and 5S rRNA genes, and two non-coding intergenic spacer  
37 regions (IGSs) between the genes. The units tandemly repeat (~150 times) in chromosome XII (Petes  
38 1979)(Kobayashi et al., 1998). A unique feature of the yeast rDNA is that it has a system to maintain the  
39 quality and quantity of the sequence in order to fulfill the huge demand of ribosomes in the cell (Gangloff et  
40 al. 1996) (for review see Kobayashi 2011). The rDNA tends to lose copies through recombination between  
41 them because of their repetitive nature and highly activated transcription. To maintain quantity, therefore, the  
42 rDNA amplifies more copies when the number is reduced (Kobayashi et al., 1998). As a result, the rDNA is  
43 continually undergoing contraction and expansion, and thus is one of the most unstable regions in the  
44 genome (Kobayashi 2014).

45 A DNA binding protein, Fob1 is a key player in the amplification reaction (Kobayashi 2003). It  
46 induces recombination for amplification by inhibiting replication at the replication fork barrier (RFB)  
47 (Supplemental Fig. S1). The inhibition induces a DNA double strand break at a relatively high frequency,  
48 and the repair process increases the number of copies by unequal sister chromatid recombination (Weitao et  
49 al. 2003) (Burkhalter and Sogo 2004) (Kobayashi et al. 2004). Recombination is also regulated by non-  
50 coding transcription (E-pro transcription) through cohesion dissociation (Kobayashi and Ganley 2005). In  
51 terms of quality control of rDNA, the sequences are always homogenized; that is, a copy with mutation is  
52 excluded by a Fob1-dependent recombination mechanism, such as gene conversion and contraction of the  
53 copies (Ganley and Kobayashi 2007). In fact, the rDNA sequences in the budding yeast are known to be  
54 relatively uniform even though about half of the copies are not transcribed (Ganley and Kobayashi 2011).  
55 Therefore, we speculate that active recombination in the rDNA maintains the integrity that ensures intact  
56 rRNA and the ribosome (Kobayashi 2014).

57 There is another face of such unstable rDNA – namely, it induces cellular senescence in budding  
58 yeast (Ganley and Kobayashi 2014). For example, in the *fob1* mutant, the rDNA is stable with less  
59 recombination and the mutant's lifespan is extended by ~60% (Takeuchi et al. 2003; Defossez et al. 1999). In  
60 contrast, in the *sir2* mutant, in which E-pro transcription is enhanced and the rDNA copy number frequently

61 changes, lifespan is shortened by ~50% (Saka et al. 2013; Kaeberlein et al. 1999). Because the rDNA is a  
62 large unstable region in the genome, its instability may affect the stability of the whole genome and thereby  
63 influence lifespan (i.e., the rDNA theory of aging) (Kobayashi 2008).

64 While we have good knowledge about yeast rDNA and its extra coding functions for aging, there is  
65 limited information on human rDNA. One reason is that the human rDNA unit (~43 kb) is much larger than  
66 the yeast rDNA unit (~9.2 kb) and it includes many small repetitive sequences in the non-coding region.  
67 Although the Human Genome Project declared its completion in 2003, it was difficult to assemble the rDNA  
68 into its actual composition using the relatively short “reads” that were obtained from the sequencing  
69 technology of those days. However, the recent development of DNA polymerase-independent long read  
70 sequencing technologies, such as the Oxford Nanopore or PacBio systems, has made it possible to assemble  
71 complete sequences of the unexplored regions (Miga et al. 2020).

72 The human rDNA is comprised of 100~500 copies in a cell (Parks et al. 2018; Agrawal and Ganley  
73 2018). Each unit of rDNA consists of the 45S precursor RNA gene (45S rDNA), whose transcript is  
74 processed into mature 18S, 5.8S, and 28S RNAs, and the IGS, which is filled with small repetitive sequences  
75 such as microsatellites and transposons (Fig. 1A). In the IGS, there are two typical repeats: the R repeat and  
76 Butterfly/Long repeat. The R repeat (~680 bp, typically three copies) is located in the termination region of  
77 the 45S rRNA gene. It contains the Sal box that is associated with the transcription factor TTFI (Grummt et  
78 al. 1986). TTFI, similar to yeast Fob1, functions to inhibit the replication fork to avoid the collision of RNA  
79 and DNA polymerase (Akamatsu and Kobayashi 2015). The Butterfly/Long repeat (~4,500 bp, typically two  
80 copies), which is composed of a Long repeat, CT microsatellite and Butterfly repeat, is located at  
81 approximately the center of the IGS (Fig. 1A) (Gonzalez and Sylvester 2001; Agrawal and Ganley 2018).

82 A previous study of rDNA composition in human cells by an *in situ* hybridization method (Fiber  
83 FISH) reported that many irregular units, such as palindromic inverted and incomplete units, account for  
84 ~35% of total copies in rDNA (Caburet et al. 2005). This high rate indicates that there is no effective  
85 recombination system to maintain rDNA homogeneity in human cells. In addition, the ratio of these non-  
86 canonical rDNA units was found to be increased in cells from progeroid syndrome patients, suggesting that  
87 human rDNA is also related to senescence. Because most progeroid syndromes, such as Werner syndrome  
88 and Bloom syndrome, are caused by mutations of the DNA repair machinery, it is plausible that the  
89 symptoms of these syndromes are caused by instability in the rDNA, which is thought to be one of the most

90 unstable DNA regions in human, as in budding yeast (Carrero et al. 2016). Indeed, previous studies have  
91 suggested that rDNA copy number varies greatly in cells from Bloom syndrome patients, and palindromic  
92 structures have been observed in Werner syndrome cells (Schawalder et al. 2003; Killen et al. 2009).  
93 However, it is still unclear whether rDNA instability is an important factor in senescence in human. In terms  
94 of the relationship between rDNA and senescence in mammals, rDNA is also known to become methylated  
95 during the passage of life (Wang and Lemos 2019). The ratio of rDNA methylation works as an “clock” that  
96 tells the individual’s age.

97 To reveal the detailed structure and integrity in the human rDNA cluster at the DNA sequence level,  
98 here we developed a method to analyze rDNA-derived long reads obtained by an Oxford Nanopore  
99 sequencer. To our surprise, we found that the rDNA array is much more regular than we expected and the  
100 sequence similarity between adjacent copies is very high. These results suggest that recombination for  
101 homogenization takes place in the human rDNA as it does in the budding yeast.

102

## 103 **RESULTS**

### 104 **Long sequence reads reveal variations among rDNA copies**

105 To determine the human rDNA structure, we analyzed both publicly available Oxford Nanopore whole  
106 genome sequencing (WGS) data from the Human Pangenomics Project (HPGP, [https://github.com/human-](https://github.com/human-pangenomics/)  
107 [pangenomics/](https://github.com/human-pangenomics/)), and our in-house Cas9-enriched rDNA reads from Epstein-Barr Virus (EBV) transformed B  
108 cells (Shafin et al. 2020) and primary fibroblast cells (Supplemental Table S1). Taking advantage of the high  
109 copy number of rDNA per cell, we modified the Cas9-enrichment strategy and established a protocol to  
110 construct a library at lower cost (Gilpatrick et al. 2020). In short, to enrich the rDNA fragments, we designed  
111 four guide RNAs around the 9,500–9,900-nt region from the start site of the coding region (45S rDNA) of  
112 the reference sequence; all four sequences were strictly conserved in human and mouse. We designed gRNAs  
113 in the coding region because this region is thought to have fewer mutations and the relationship between two  
114 neighboring 45S rDNAs can be analyzed in a single read. Total DNA was dephosphorylated with CIP to  
115 avoid ligation to the sequencing adapter. The DNA was then digested by Cas9 ribonucleoprotein (RNP).  
116 Because only the Cas9-digested DNA fragments have a phosphorylated-5’ end, the sequencing adapters are  
117 specifically ligated to the fragments. In analyzing the HPGP genomic data, we removed reads shorter than  
118 40,000 nt to eliminate those that were thought to come from rDNA-derived pseudo genes in non-rDNA

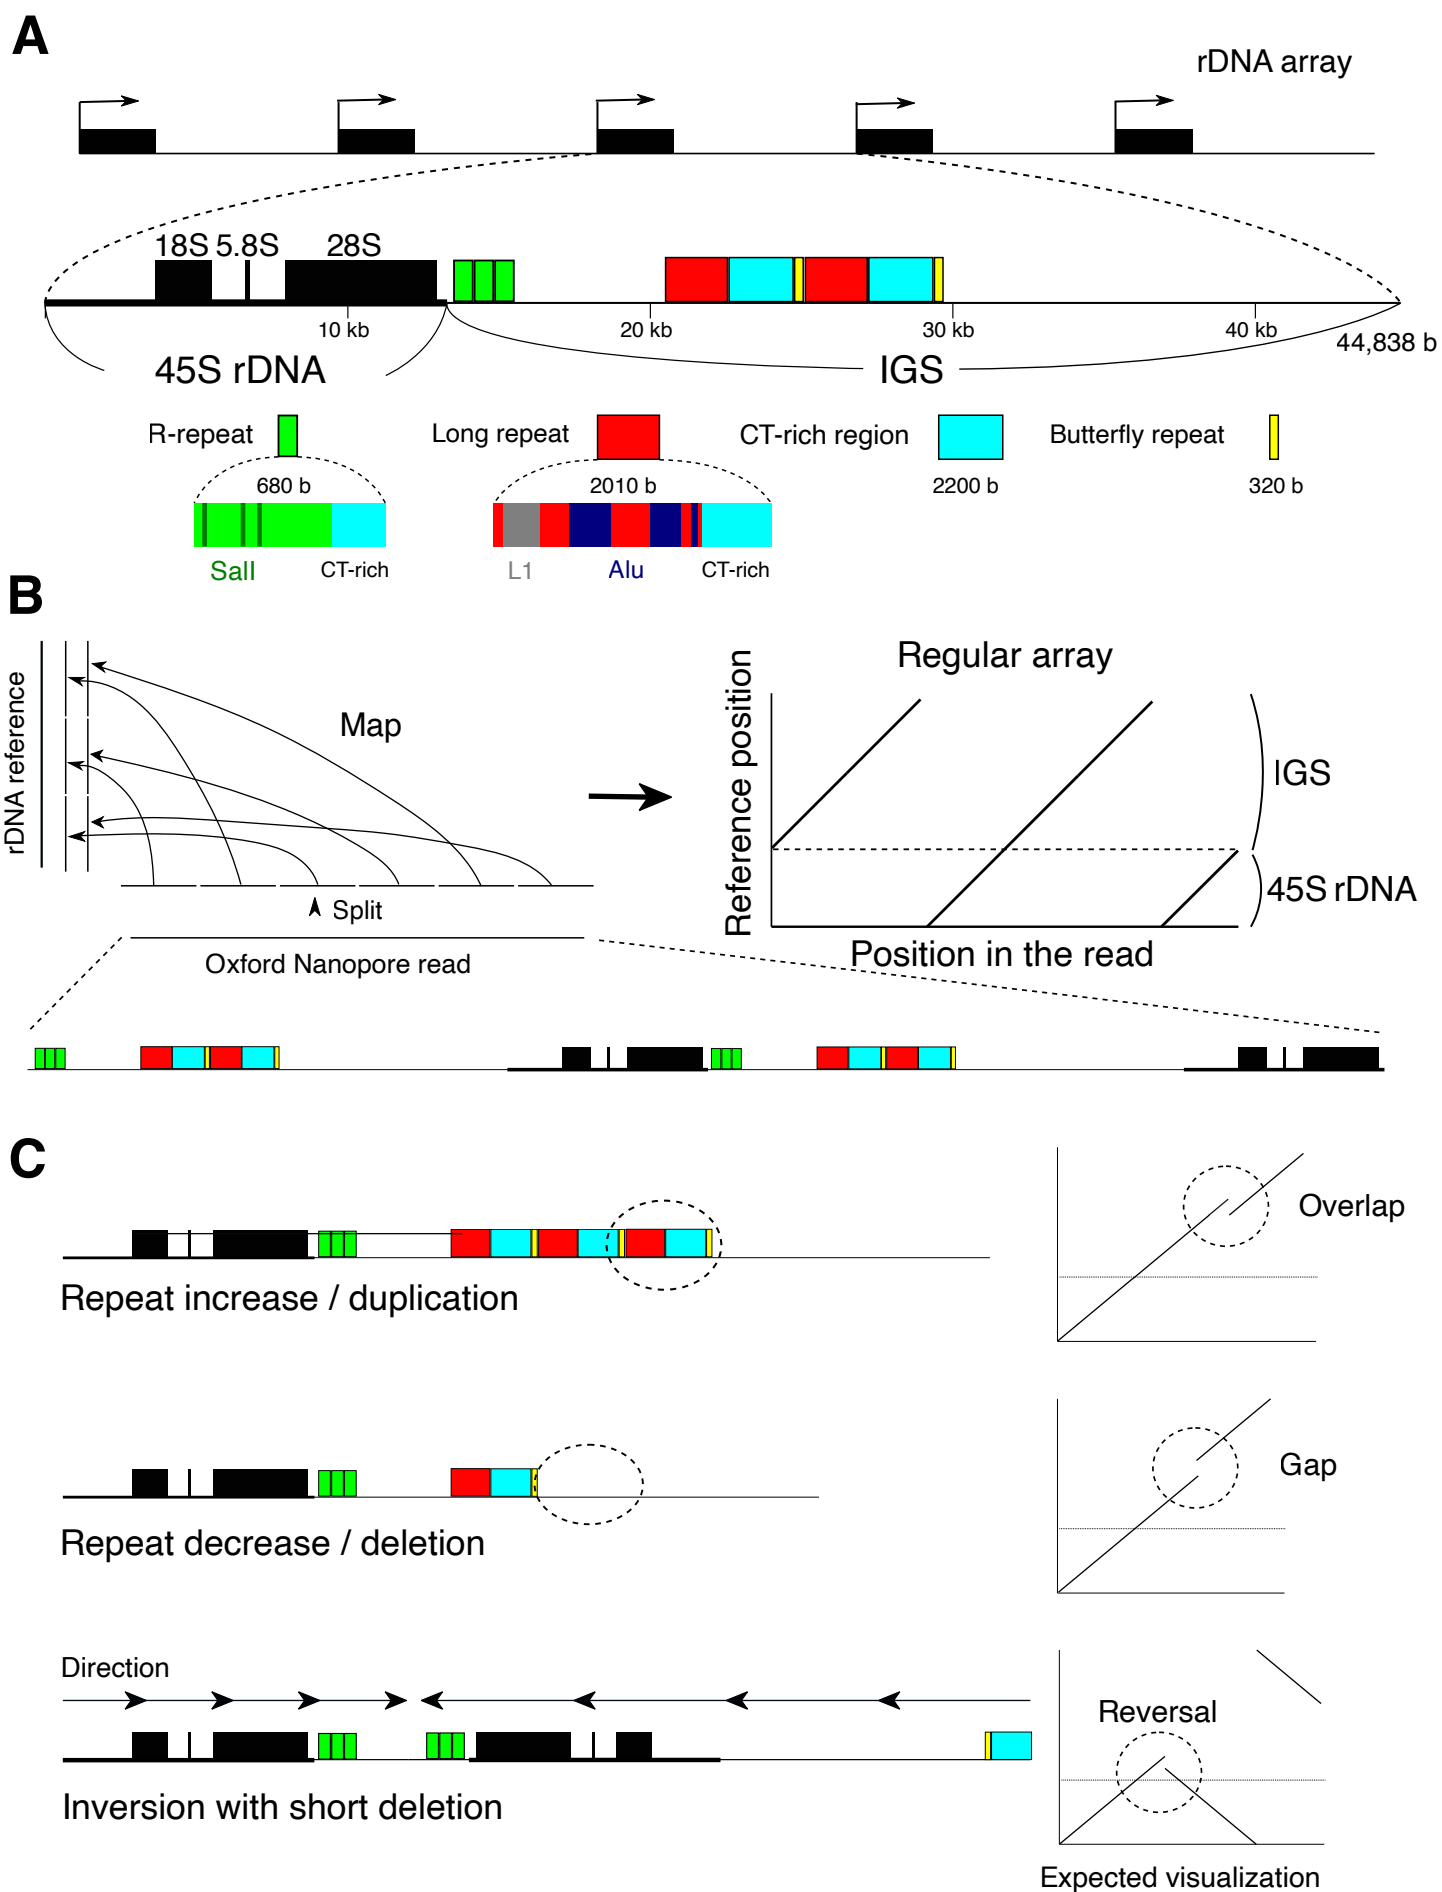

Fig.1

119 **Figure 1. rDNA structure and strategy for visualizing rDNA.**

120 (A) Structure of rDNA. rDNA is largely divided into the coding 45S rRNA gene (45S rDNA) and the non-  
121 coding intergenic spacer (IGS). The IGS has repetitive sequences, such as microsatellite and transposable  
122 elements. Here, typical R and Long/Butterfly repeats are shown. (B) rDNA visualization strategy for  
123 Nanopore reads containing rDNA. First, the read is split into 300-nt sections, and each split read is mapped  
124 to the rDNA reference sequence. The structure is then reconstructed based on the position in the read and the  
125 mapped position in the reference. (C) Typical mutations and how they look in the visualization strategy.

126 -----

127 genomic regions. For our in-house Cas9-enriched data, we analyzed the reads from DNA fragments in which  
128 both ends were digested with Cas9 RNP.

129 To determine the structure of rDNA, we developed a method that visualizes multiple copies of rDNA  
130 and the structural variation. In this method, the reads are split into 300 nt and mapped to an rDNA reference  
131 sequence (GenBank accession KY962518.1) using BWA MEM aligner software suited for long read  
132 mapping (Li 2013; Kim et al. 2018). The shorter split length increases not only resolution but also the effect  
133 of sequencing errors of the Nanopore sequencer and reduces mapping frequency. By testing several lengths  
134 of split reads, we found that a 300-nt split is long enough to accomplish high mapping frequency  
135 (Supplemental Fig. S2A). Each 300-nt split read (short line) is plotted based on its location in the original  
136 read and its mapped position in the reference sequence (see Materials & Methods; Fig. 1A, left panel).  
137 Therefore, when the reads are the same as the reference, a continuous straight line is generated (Fig. 1B,  
138 right panel). If there is a deletion, duplication or translocation, however, the line will be discontinuous (Fig.  
139 1C). In selecting the reference sequence, we compared three different reference sequences of human rDNA  
140 (GenBank accession KY962518, U13369, and AL592188) by counting the number of gaps between  
141 successive split and mapped reads. If the distance between two neighboring mapped reads differed from the  
142 expected distance (300 nt) by more than 100 nt, we considered that the pair was gapped and we counted the  
143 number of gaps. We found that KY962518 had the least number of gaps for all samples and thus should be  
144 the most typical rDNA sequence as the reference (Supplemental Fig. S2B) (Agrawal and Ganley 2018; Kim  
145 et al. 2018).

146 Fig. 2A shows actual representative data of a Cas9-enriched read. The read (~40 kb) had one copy of  
147 rDNA with a gap in the Butterfly/Long repeat and a duplication in the R repeat region. Fig. 2B shows actual  
148 data from HPGP WGS sequencing. The length of this read was ~110 kb, corresponding to two and a half  
149 tandem copies of rDNA, that is, IGS–45S–IGS–45S–IGS. From the visualization, we could identify that all of  
150 the copies had the same duplicated regions in the Butterfly/Long repeat region. Therefore, this split-and-map

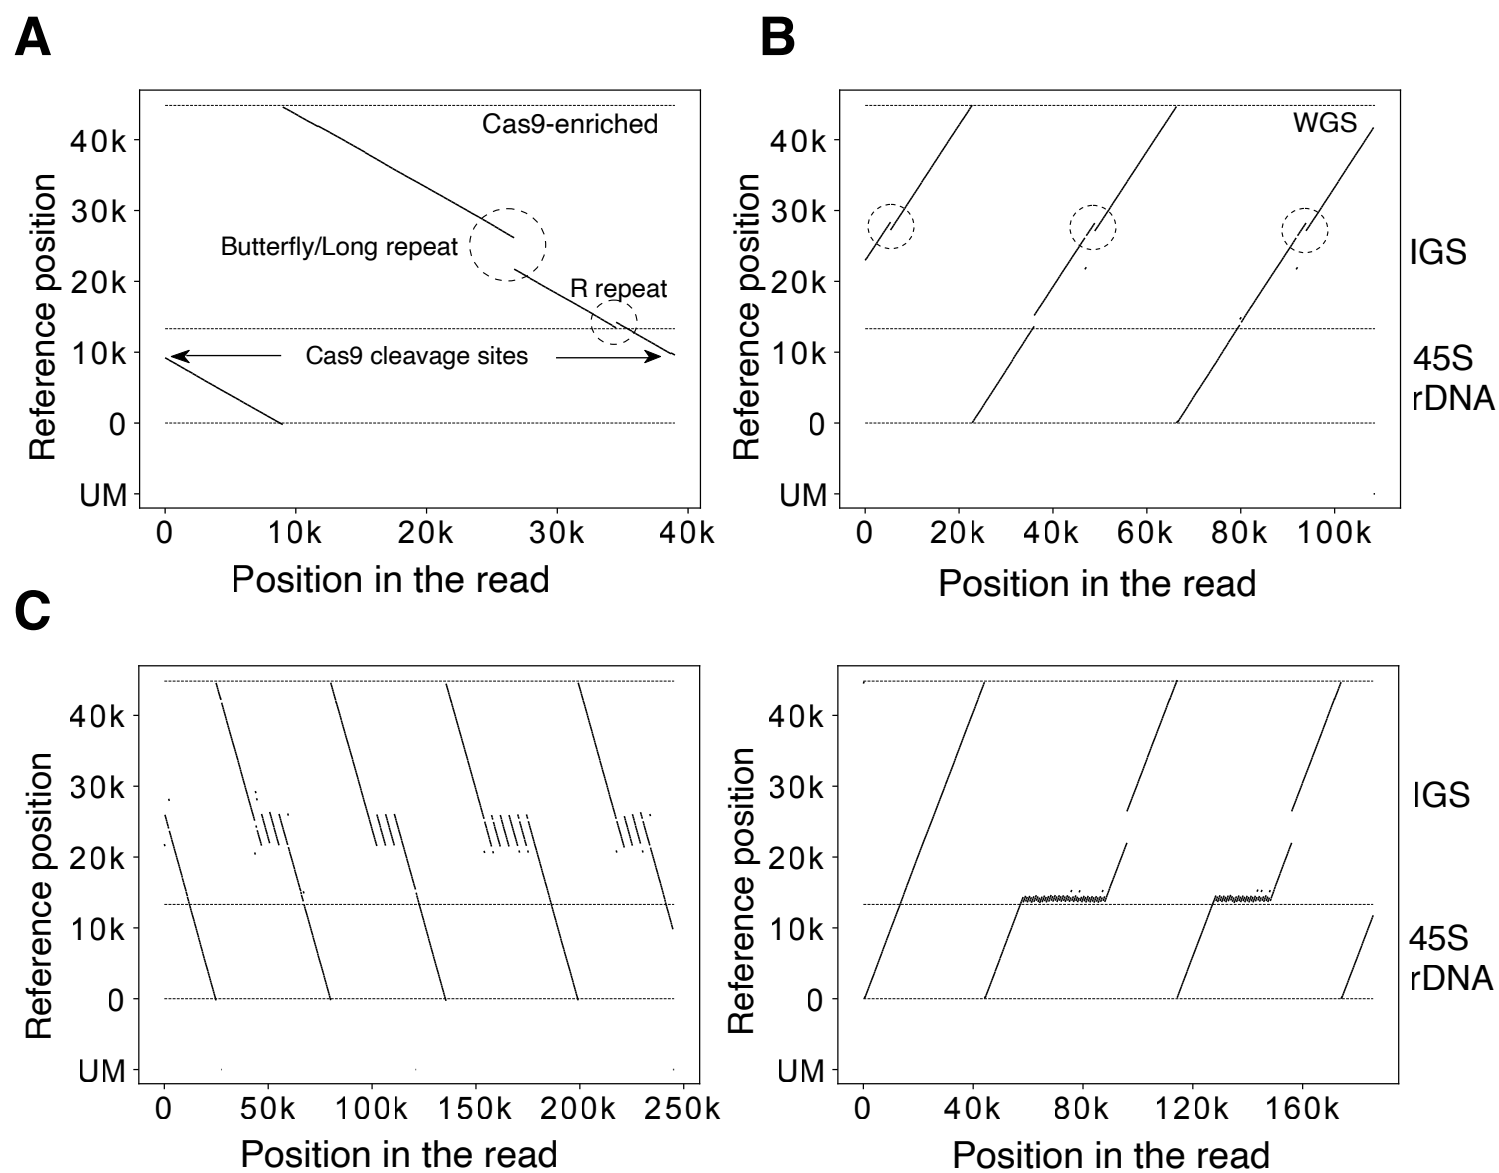

Fig.2



151 **Figure 2. Visualization examples.**

152 (A)(B) Representative visualization pattern of a read obtained from Cas9-enrichment (A) and whole genome  
153 (B) sequencings. The vertical axis is the mapped position in the reference; the horizontal axis is the position  
154 in the Oxford Nanopore read. The horizontal dashed lines indicate the end of the reference and the border  
155 between 45S rDNA and IGS. The unmapped split-reads are shown at the bottom (UM). The Sal box and the  
156 Butterfly/Long repeat region, which show variability among copies, are indicated (A). The same type of IGS  
157 variation is seen in all three rDNA copies (dashed circles) (B). (C) rDNA copies with an extremely long  
158 Butterfly/Long and R repeat. These sequences cannot be analyzed by short-read sequencers.

159 -----  
160 visualizing method is robust and should work in the structural analysis of rDNA. A strong point of the long-  
161 read sequencer is that repeat structures of DNA can be analyzed; indeed, we were able to identify copies with  
162 extremely high repeat number variation in their IGS (Fig. 2C). In contrast, a weak point is that the fidelity of  
163 sequencing is not as high as that of short-read sequencers. But, as mentioned above, selecting an appropriate  
164 split length (300 nt) reduces this weakness and makes our structural analysis possible.

165  
166 **R and Butterfly/Long repeats are highly variable between copies**

167 By applying the split-and-map visualizing method to Nanopore data, we analyzed 39 samples  
168 (individuals) and identified variations in the Butterfly/Long and R repeat regions (Fig. 3A). By measurement  
169 of the Butterfly/Long repeat length of each read in each individual, we could classify the distribution into  
170 two types based on the proportion of copies that were more than 2,000 bases shorter than the reference (Fig.  
171 3B; Supplemental Fig. 3A). These two types were also clearly differentiated by principal component analysis  
172 (PCA), confirming that our classification was not arbitrary (Supplemental Fig. S3B). In the shorter type,  
173 there were three discrete peaks and two of them were shorter than the reference. (e.g., HG03516). In the  
174 longer type (e.g., HG02080), the smaller peaks were not obvious in many cases, and more than 70% of  
175 copies were almost the same as the reference. Interestingly, all of the Japanese samples belonged to the  
176 shorter type (N=6: A0031, BSL2KA, PSCA0023, PSCA0047, PSCA0060, PSCA0517). Thus, there are  
177 differences among populations. In terms of the R repeat, the copy number varied from 0 to 4 (average 2–3  
178 for most samples). As shown in Supplemental Fig. S4, the variation among samples was much larger for the  
179 R repeat than for the Butterfly/Long repeat and there were no clear differences among populations.

180  
181 **Contiguous copies have similar variation patterns**

182 By comparing copies within reads that contain more than one copy of rDNA, the similarity between  
183 contiguous copies can be calculated. Specifically, we analyzed the differences in lengths of the R and  
184 Butterfly/Long repeat regions (Fig. 3C, upper panel). As a control, we also simulated the case where two  
185 random copies are compared (Fig. 3C, lower panel; Supplemental Fig. S5). In all samples, the distributions  
186 of length difference between contiguous copies were clearly shorter than the randomized simulated control in  
187 both regions. These observations indicate that contiguous copies are more similar than non-contiguous ones.  
188 Therefore, this suggests that gene conversion, at least, occurs locally and homogenizes the sequences of  
189 these repeats.

190

### 191 **The rDNA is quite regular in human cells**

192 Next, we analyzed larger-scale structural features of the rDNA. In a previous study, it was reported that  
193 human rDNA contains many non-canonical irregular copies, such as palindrome structures (Caburet et al.  
194 2005). Such irregular structures were suggested by a Fiber FISH (DNA combing) assay, in which long rDNA  
195 spread on a slide glass is hybridized with two fluorescent probes for different sites in the rDNA and  
196 fluorescence signals are detected by microscopy. As a result, uncanonical copies are identified by the  
197 irregularity of the aligned dotted signals. The study indicated that irregular rDNA copies account for ~35%  
198 of total rDNA copies in a cell. Furthermore, this ratio was much increased in cells from Werner syndrome  
199 patients (~50%).

200 Using long sequence reads, we expected to obtain a more accurate description of the larger-scale  
201 structure of rDNA. First, we screened the reads in which more than 10% of the split reads were mapped in  
202 the opposite direction to the majority of the split reads and labeled them as inverted reads. Then, using the  
203 split-and-map visualizing data, we measured the distances between the splits, and compared them to the  
204 distance that was calculated from the reference sequence: if the repeat has an irregularly aligned or unusual  
205 structure, the distance between adjacent split reads will be larger and we can detect the difference.  
206 Unexpectedly, we found that reads with such large gaps are rare; that is, most of the rDNA copies were  
207 beautifully tandemly aligned on the chromosomes (Supplemental Table S1). In fact, the rate of non-canonical  
208 copies excluding palindromic reads in the healthy samples was less than 1% (0% ~ 0.7%). Furthermore, in  
209 ~30% (12/39) of the individual samples, no non-canonical copies were detected. The most common

210

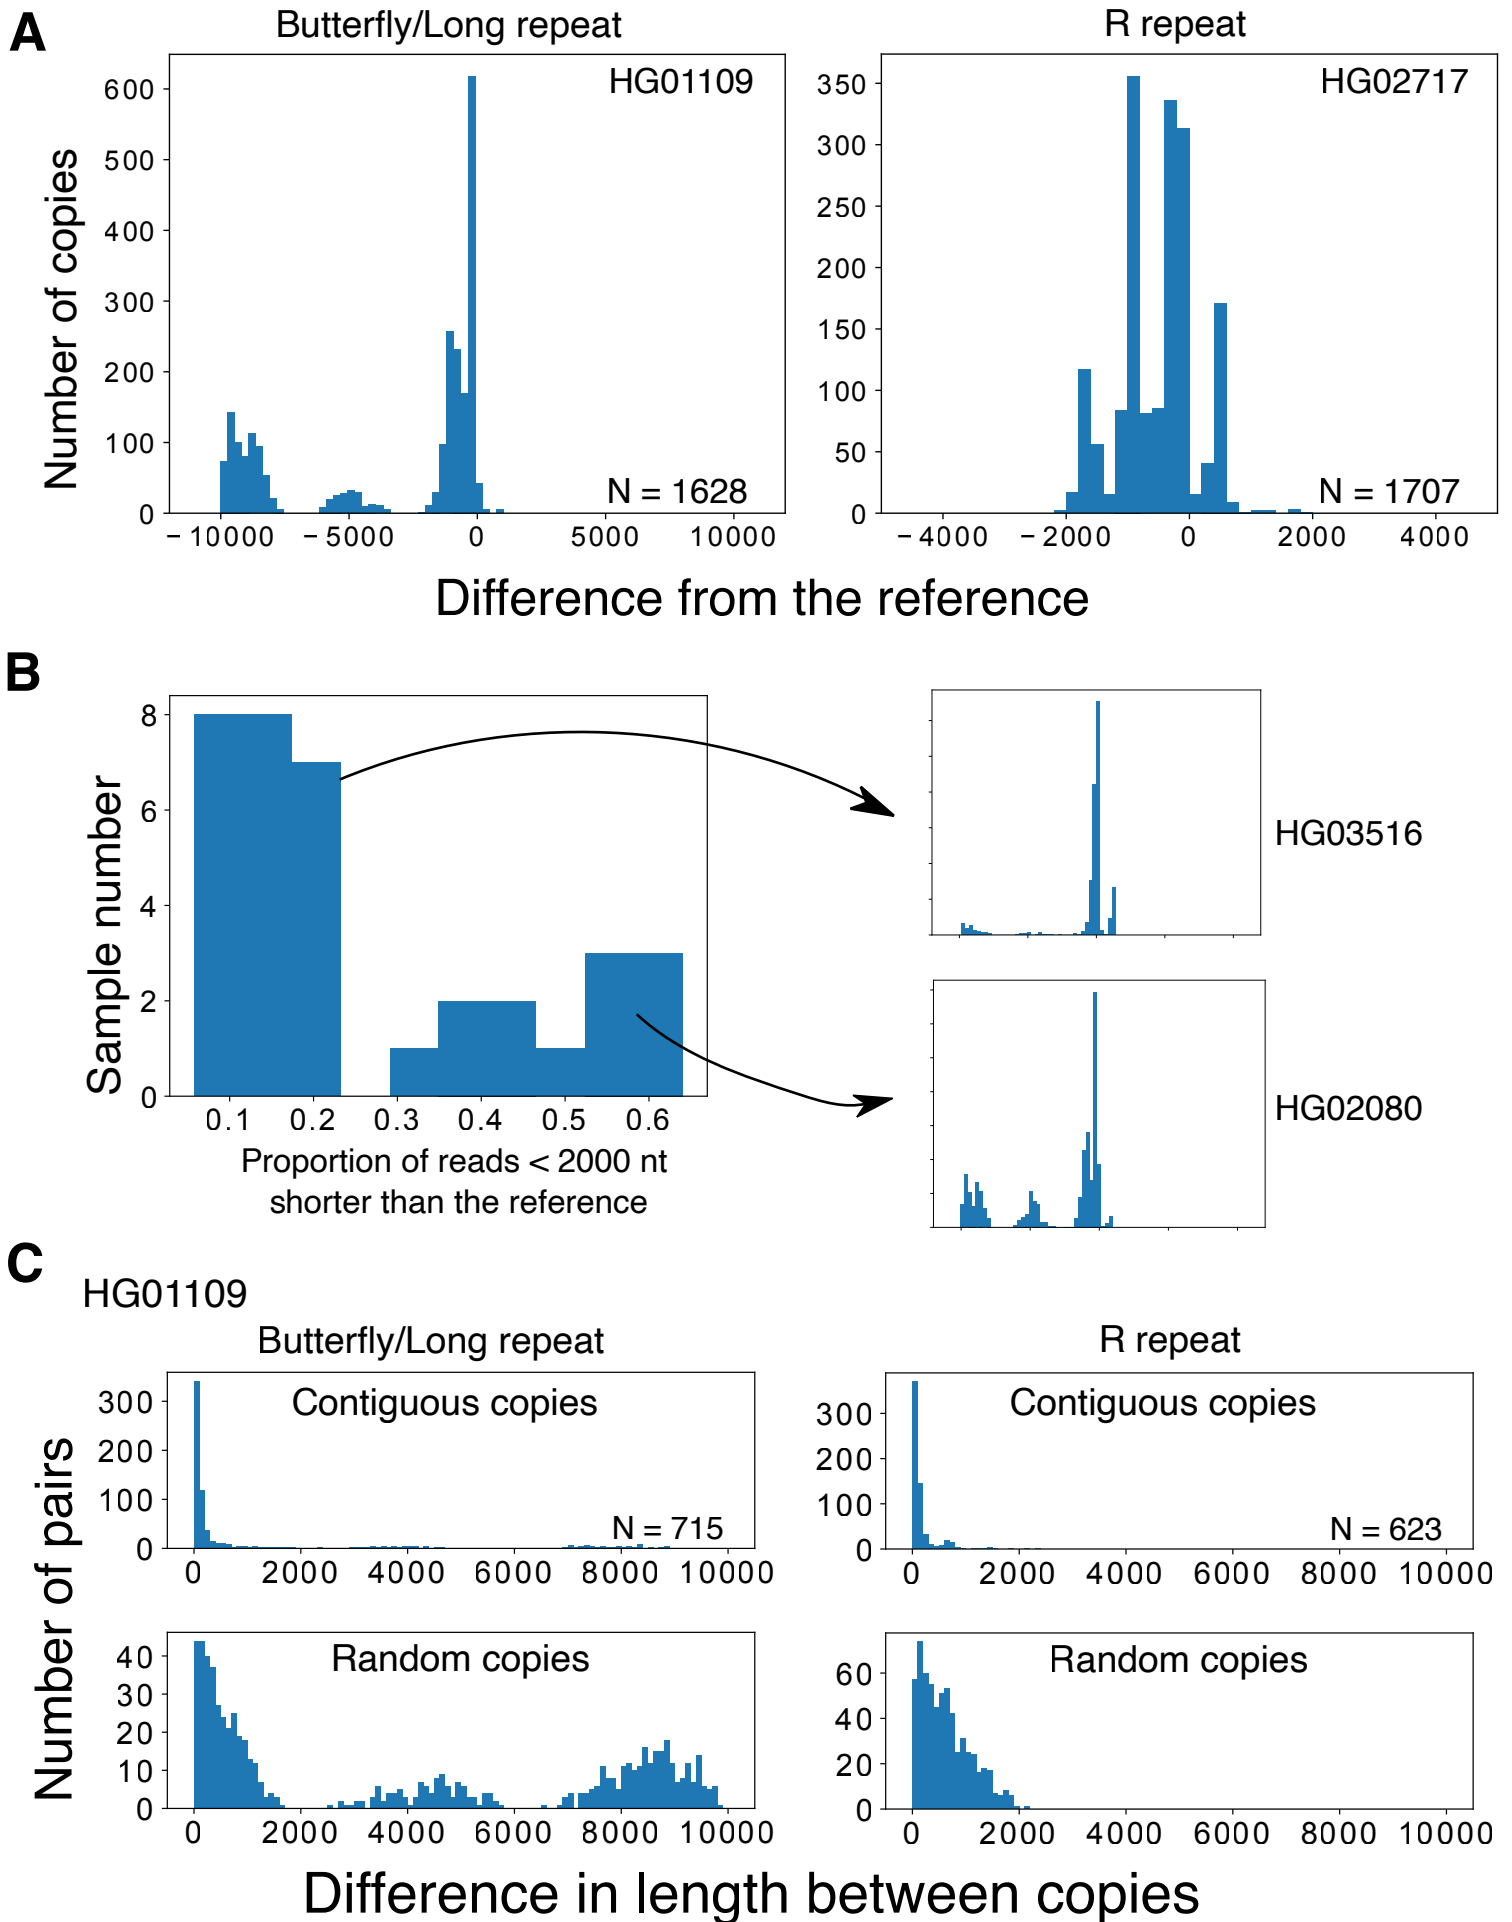

Fig.3

211 **Figure 3. Variations in the IGS region.**

212 (A) Length distributions of the variable Butterfly/Long and R repeats of the rDNA IGS in WGS samples.  
213 Distributions are plotted based on the difference from the reference (0 indicates the reference length). In  
214 these samples, repeat number variations can clearly be seen in the discrete peaks. (B) Plot showing the  
215 proportion of reads with a Butterfly/Long repeat length shorter (<2,000 nt) than the reference for each  
216 sample. The samples can clearly be divided into two categories with each category having a similar pattern  
217 of size distribution among individuals (Supplemental Fig. 2). Typical distributions of long (HG03516) and  
218 short (HG02080) types are plotted on the right. (C) Differences in the length of contiguous reads calculated  
219 for the R and Butterfly/Long repeats (Upper panels). As a control, we calculated the differences in the length  
220 of the repeats of randomly picked copy pairs (Lower panels).

221 -----  
222 structural mutation was duplication from the R repeat to the Long repeat region (Fig. 3A left; Supplemental  
223 Table S1). We consider this type of mutation to be a common variation because it is limited to the IGS  
224 region, where it is likely to have little impact on rRNA transcription. Another typical structural mutation was  
225 deletion (Fig. 4A right).

226 It should be noted that we found many palindromic reads, but they are thought to be artifacts for the  
227 following reason. The Oxford Nanopore sequencer reads single-stranded DNA by separating double-stranded  
228 DNA at the pore (Fig. 4B). If the separation does not occur properly at the end of the first strand, sequencing  
229 of the second complementary strand may follow immediately (de Lannoy et al. 2018). Therefore, the  
230 resulting sequence read will look like a palindrome. Such “fake” palindromic reads should have their  
231 inversion site at the center of the read in cases where they were sequenced completely. A sequencing reaction  
232 may stop at any point in a read for various reasons. If it stops after the inversion, the inversion site should be  
233 in the latter half of the sequenced read. Taken together, if a palindromic read is an artifact, the inversion site  
234 will be at the center or in the latter half of the read. We therefore investigated the relative position of the  
235 inversion site in each palindromic read for HPGP samples. As shown in Fig. 4D, most of the inversion points  
236 appeared after the center, which strongly indicates that most of the palindromic reads are the result of the  
237 aforementioned artifacts. In addition, many such pseudo-palindromic reads showed a sudden drop in  
238 sequencing quality score around the inversion site. Some of the reads with an inversion site in the former half  
239 also showed a sudden drop in sequencing quality score, possibly meaning that they also are not real  
240 palindromes. Nevertheless, assuming that the reads with their inversion site in the first half are true  
241 palindromes, the estimated frequency of palindromic inversion is ~1 in 2000 copies. In summary, the human  
242 rDNA is a very regular array (>99.3%) and aberrant structures such as palindromes are not common.

243

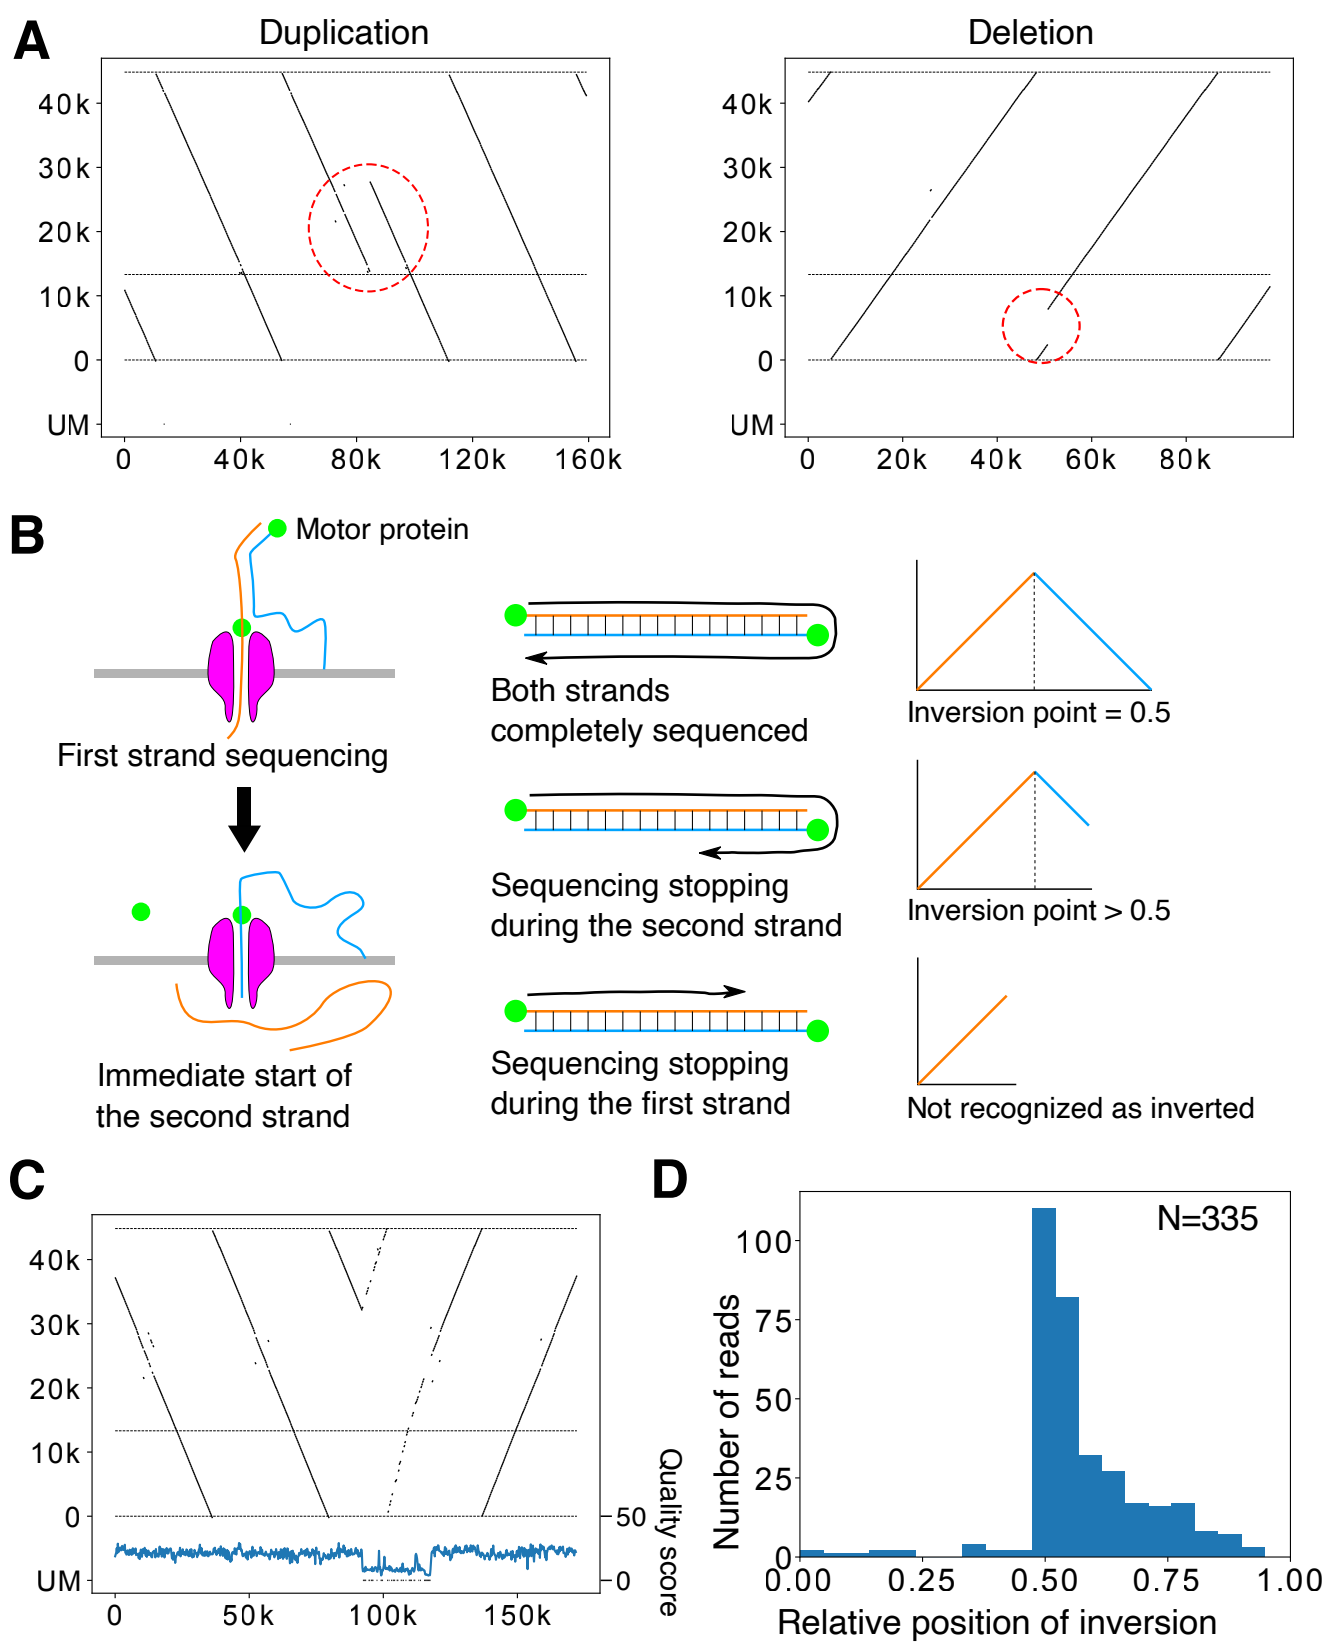

Fig.4

244 **Figure 4. Large-scale structural variation in the rDNA array.**

245 (A) Representative reads with large-scale variation in the rDNA array. (Left panel) The R to Butterfly/Long  
246 repeat region is doubled. (Right panel) A large portion of rDNA in the 45S rDNA is deleted. (B) The  
247 mechanism of Nanopore template switching that causes artifactual “fake” palindromic reads. (Left panel)  
248 After the completion of first strand sequencing, second (complementary) strand sequencing sometimes  
249 occurs. (Right panel) When sequencing terminates randomly after strand switching, the resulting distribution  
250 of the inversion points in the reads should be seen in only the latter half of the reads. (C) A representative  
251 palindromic read. Note that the structure and the end points of the read are remarkably similar before and  
252 after the inversion point, although the read is relatively long. The Phred quality scores plotted below were  
253 smoothed by binning and averaging. A sudden drop in quality score is observed just after the inversion point.  
254 (D) Plot of the relative position of inversion in each read for HPGP samples. The distribution is peaked at the  
255 center and heavily skewed to the latter half of reads, suggesting that most of the palindromic reads are  
256 artifacts.

257 -----

258 **45S rDNA is “all-or-none-methylated”**

259 Oxford Nanopore sequencing can also detect CpG methylation without any prior treatments. We therefore  
260 investigated the rate of CpG methylation in the human rDNA. The methylation status of each read was  
261 calculated by binning (bin size 200 nt). We used two methods for calculating the methylation frequency of  
262 45S rDNA in each bin: first, we calculated the expected value of the proportion of methylated bases by  
263 simply taking the mean of the posterior probability of each CpG being methylated that was output by Oxford  
264 Nanopore Guppy basecaller (Supplemental Fig. S6 “average”); and second, we estimated the proportion of  
265 bases likely to be methylated by setting a threshold on the posterior probability (Supplemental Fig. S6,  
266 “threshold”). We obtained similar results by both methods; that is, the distinction between the methylated  
267 (>0.1) and less methylated (~0.0) copies was clear in most samples except A0031 and HG03098.

268 We present an example of the visualization of rDNA methylation level using this method in Fig. 5A.  
269 In this read, the right two 45S rDNA copies were less methylated and the left one was highly methylated. We  
270 summarized the methylation status of 45S rDNA in another sample (HG00733) (Fig. 5B). Clearly, there were  
271 methylated and less methylated copies of 45S rDNA. Notably, the less methylated 45S rDNA copies were  
272 almost methylation-free (“unmethylated”); therefore, we may say that 45S rDNAs can be classified in two  
273 states, summarized as “all-or-none-methylated” (Fig. 5B). Furthermore, the unmethylated copies are thought  
274 to be transcribed (Kass et al. 1997).

275

276 **Methylation in contiguous 45S rDNA and the IGS is correlated**

277 In contrast to coding 45S rDNA copies, the non-coding IGS seems always to be methylated based on  
278 our visualization (Fig. 5A). Therefore, we investigated methylation status in the IGSs quantitatively. Because  
279 the Butterfly/Long repeat contains microsatellites with few CpG pairs and its length is variable, we excluded  
280 this region from the analysis. As a result, we found that nearly all of the IGSs are heavily methylated  
281 (average 51%) (Fig. 5C; Supplemental Fig. S7). Furthermore, we evaluated the methylation rate of 45S  
282 rDNA and its contiguous IGS and found that the rate of methylated bases in the IGS was correlated with the  
283 methylation level of contiguous 45S rDNAs in many individuals when the calculation was limited to strongly  
284 methylated 45S rDNA (>0.3), although the strength of correlation differed among samples (Fig. 5D;  
285 Supplemental Table S2). Overall, these observations suggest that heavily methylated 45S rDNA and the  
286 contiguous IGS together form heterochromatin.

287

### 288 **Contiguous 45S rDNAs have a similar CpG methylation pattern**

289 Using information in large reads containing several rDNA copies, we analyzed the relationship of  
290 methylation status among contiguous 45S rDNAs (Fig. 5E; Supplemental Fig. S8). Interestingly, we found  
291 that contiguous 45S rDNA copies have a similar CpG methylation pattern as compared with noncontiguous  
292 random copies. In other words, unmethylated 45S rDNAs form clusters. This suggests that heterochromatin  
293 structure is present in the large rDNA region and the transcription of rDNA is inhibited in this region.

294 We also examined how often methylation status changes in each chromosome. A previous study  
295 suggested that the transcriptional state of rDNA is determined at the chromosome level (Roussel et al. 1996).  
296 We found that a contiguous pair with different methylation status occurs at the frequency about 1 in 20 pairs  
297 in many individuals (Supplemental Table S3). Therefore, chromosomes that have more than 20 copies of  
298 rDNA should have, on average, more than one change in methylation status. This speculation is supported by  
299 a recent study (van Sluis et al. 2020).

300

### 301 **The number of R repeats is not related to rDNA methylation**

302 Next, we tested the correlation between 45S rDNA methylation rate and the copy number of the R repeat that  
303 is associated with TTF1 (Grummt et al. 1986). Notably, Spearman correlation between the 45S rDNA  
304 methylation rate and R repeat copy number differed among individuals (21/32 individuals showed >0.05  
305 false discovery rate). Even in samples with a clear correlation, the tendency was not consistent among

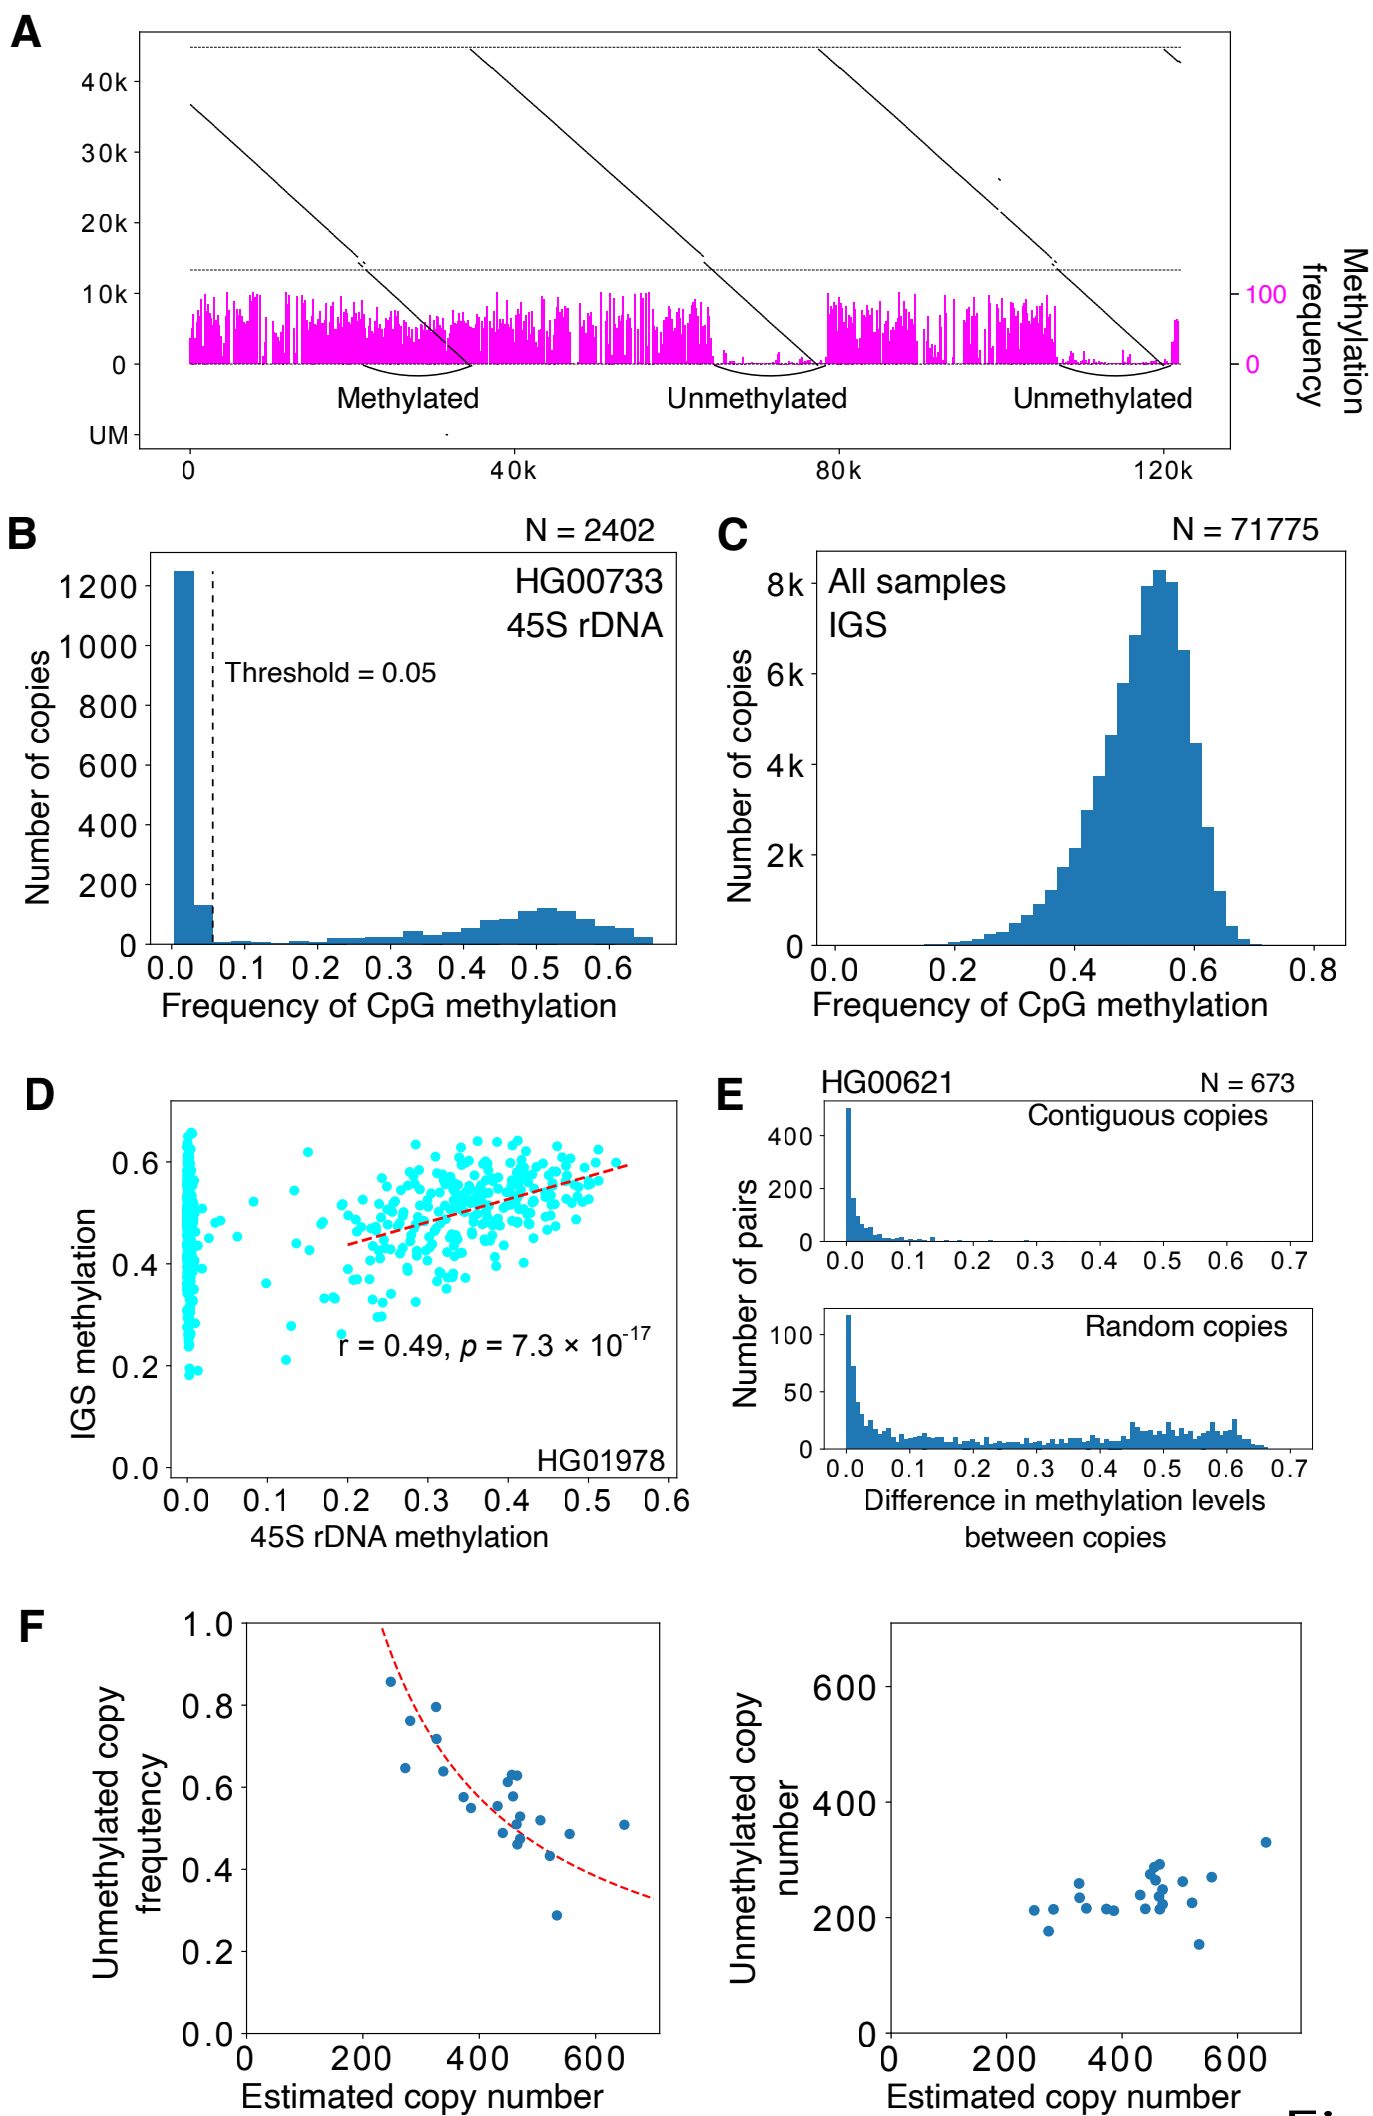



306 **Figure 5. Methylation analysis of rDNA.**

307 (A) Representative visualization of CpG methylation. Reads are split into 200-nt bins and the expected  
308 frequency of CpG methylation is calculated for each bin using posterior probability output by Guppy  
309 basecaller. The methylation frequency of each bin is shown as a vertical blue bar. In the read shown, both the  
310 methylated and less methylated 45S rDNA are included. Note that the three IGS methylation patterns are  
311 similar despite the difference in the 45S rDNAs. (B) Average proportion of methylated CpG for each 45S  
312 rDNA (calculated by taking the mean of posterior probabilities), and distribution in the HG00733 sample.  
313 Dashed line indicates the border between the less methylated copies and methylated copies. (C) Proportion  
314 of CpG methylation in the IGS in all samples. Most of the IGS copies are heavily methylated. (D)  
315 Methylation level of 45S rDNA and its flanking IGS. In many samples, there is a clear correlation for copies  
316 with highly methylated 45S rDNA (dashed line). (E) Differences in the methylation levels of contiguous 45S  
317 rDNAs and randomized controls. The methylation pattern is similar between adjacent copies of contiguous  
318 45S rDNA, as in the case of repeat number variation in the IGS (Fig. 3C). (F) Relationship between the  
319 estimated rDNA copy number and the proportion of unmethylated copies (left) or the estimated number of  
320 unmethylated copies (right). Dashed line in the left panel is a theoretical line based on the assumption that  
321 the number of active rDNA copy is constant at 230.

322 -----

323 individuals and both positive and negative correlations were observed (Supplemental Fig. S9, Supplemental  
324 Table S4). We speculate that the correlations observed in some samples were the effect of the correlation of  
325 contiguous copies; thus, they do not reflect a true correlation. Collectively, these observations suggest that  
326 the R repeat plays little role in the transcription of rRNA.

327

328 **There is no strong correlation between age, instability and methylation**

329 Next, we sequenced two samples from young individuals (20s) and two from older individuals (70s)  
330 to investigate age-related changes in rDNA structure (Supplemental Table 1, row# 4-7). Between the Cas9-  
331 enriched young and old samples, no large-scale structural differences were observed. This is consistent with  
332 the previous finding that aging does not increase such differences (Caburet et al. 2005).

333 It has been proposed that the rate of methylation of 45S rDNAs is increased with age (Watada et al.  
334 2020; Wang and Lemos 2019). We therefore tested this relationship using the two young samples and two  
335 older samples obtained by Oxford Nanopore sequencing. However, neither the rate of unmethylated copies  
336 nor the average methylation level of methylated copies was increased in the older samples (Supplemental  
337 Table S1). It should be noted that we did not analyze methylation status in the same individual over time and  
338 that the number of samples was not sufficient to draw conclusions, which may explain why our results were  
339 different from previous studies.

340

## 341 **Higher rDNA copy number, more methylated coding regions**

342 We analyzed the relationship between rDNA copy number and methylation rate. To estimate the  
343 rDNA copy number per cell, we used the ratio of rDNA reads to the total reads in each sample. By this  
344 calculation, the rDNA copy number ranged from 250 to 700 copies per cell (Supplemental Table S4; Fig.  
345 5F). These values showed good agreement with previously reported data derived by different methods, such  
346 as quantitative PCR and short-read high-throughput sequencing (Malinovskaya et al. 2018; Parks et al.  
347 2018).

348 To analyze the relationship between rDNA copy number and methylation rate, we used only the  
349 HPGP data that were generated by the Human Pangenomics Reference Consortium (HPRC), which were all  
350 thought to be obtained around the same period and basecalled with Guppy 4.0.11 (see Methods). This was  
351 done to avoid artifacts caused by different library preparation and sequencing conditions. From the analysis  
352 of 23 HPGP samples, we found that the number of rDNA copies and the ratio of unmethylated copies per cell  
353 were negatively correlated (Pearson correlation,  $r = 0.749$ ,  $p = 1.15 * 10^{-5}$ ). In other words, the number of  
354 unmethylated copies was roughly constant irrespective of rDNA copy number per cell (Pearson correlation,  $r$   
355  $= 0.07$ ,  $p = 0.625$ ) (Fig. 5F, right).

356

## 357 **rDNA instability is increased in progeroid syndrome**

358 We also analyzed two cell lines derived from patients with progeroid syndrome: namely, Bloom syndrome  
359 patient B cells derived by EBV transformation, and Werner syndrome patient primary fibroblast cells. These  
360 syndromes are caused by mutations in the DNA repair machinery, which increases genome instability (Killen  
361 et al. 2009). A previous study using the Fiber FISH method suggested that the structure of rDNA is highly  
362 aberrant (~50% of total rDNA copies) in Werner syndrome patients (Caburet et al. 2005). Based on the Cas9-  
363 enriched Oxford Nanopore sequencing method, the rate of non-canonical (e.g., real palindrome) copies was  
364 1.2% and 2.4% in Werner and Bloom patient cells, respectively. These values are much higher than those in  
365 the normal samples (~0.2%), but much lower than the previously reported value (~50%). In both progeroid  
366 syndrome samples, we found characteristic reads, including a duplication within the 45S rDNA that may  
367 create a non-canonical rRNA structure (Supplemental Fig. S10; Supplemental Table S1). Interestingly, these  
368 mutations were concentrated around the 7,000–14,000-nt region in the reference. Because they were

369 relatively rare in the other samples (Supplemental Table S1, column 7), we speculate that they are genomic  
370 instability “hotspots”, where mutation is frequent in DNA repair compromised cells.

371

### 372 **Human pluripotent stem cells have a different methylation status**

373 Next, we analyzed rDNA methylation status in human induced pluripotent stem cells (hiPSCs,  
374 201B7) by Cas9-enriched sequencing. In ESCs and iPSCs, rDNA is thought to be globally unmethylated  
375 because of the high transcription activity (Gupta and Santoro 2020). Unexpectedly, however, around half of  
376 the 45S rDNAs were methylated and the IGS was heavily methylated in the iPSCs, similar to differentiated  
377 cells (Fig. 6A; Supplemental Fig. S11, see Discussion). We also tested iPSCs derived from Werner syndrome  
378 patient fibroblast cells (A0031) (Shimamoto et al. 2014). Similarly in these iPSCs, a substantial proportion of  
379 45S rDNAs were methylated and the frequency was higher than in the original A0031 fibroblast cells (52%  
380 vs 43% ,  $p \approx 1.2 * 10^{-6}$ , Fisher’s exact test, Fig. 6B), in contrast to the results of previous studies  
381 (Woolnough et al. 2016; Wang and Lemos 2019).

382 In terms of rDNA stability, the frequency of aberrant structures was found to be significantly  
383 decreased in A0031-derived iPSCs ( $p \approx 0.007$ , Fisher’s exact test, Supplemental Table S1). This is consistent  
384 with the finding that iPS induction suppresses chromosomal instability (Shimamoto et al. 2014), and we  
385 speculate that cells with stable genetic information are selected during the iPS induction process. If this is the  
386 case, the increased methylation of the transcribed region might be due to the selection process.

387

### 388 **rDNA structure and methylation in mouse**

389 To test the generality of the Nanopore sequencer, we also analyzed two mouse-derived samples  
390 (bone marrow cells extracted from femur of an 8-week-old male C57BL/6J mouse and feeder-free ht7  
391 embryonic stem cells (ESCs) derived from 129/Ola strain) (Niwa et al. 2000). Although mouse ribosomal  
392 DNA has been said to be around 45 kb in length (Grozdanov et al. 2003), we found that the average  
393 estimated size was much shorter than previous reported at 39.5 kb and 38 kb for C57BL/6J and ht7,  
394 respectively. Mouse rDNA also has variation in repeat number in the IGS, and this seems to determine the  
395 size distribution of rDNA (Fig. 6C; Supplemental Fig. S12).

396 In terms of methylation, 45S rDNAs of mESCs were almost completely free from methylation,  
397 which is comparatively different from hiPSCs (Fig. 6D right). In bone marrow cells, some of the 45S rDNAs

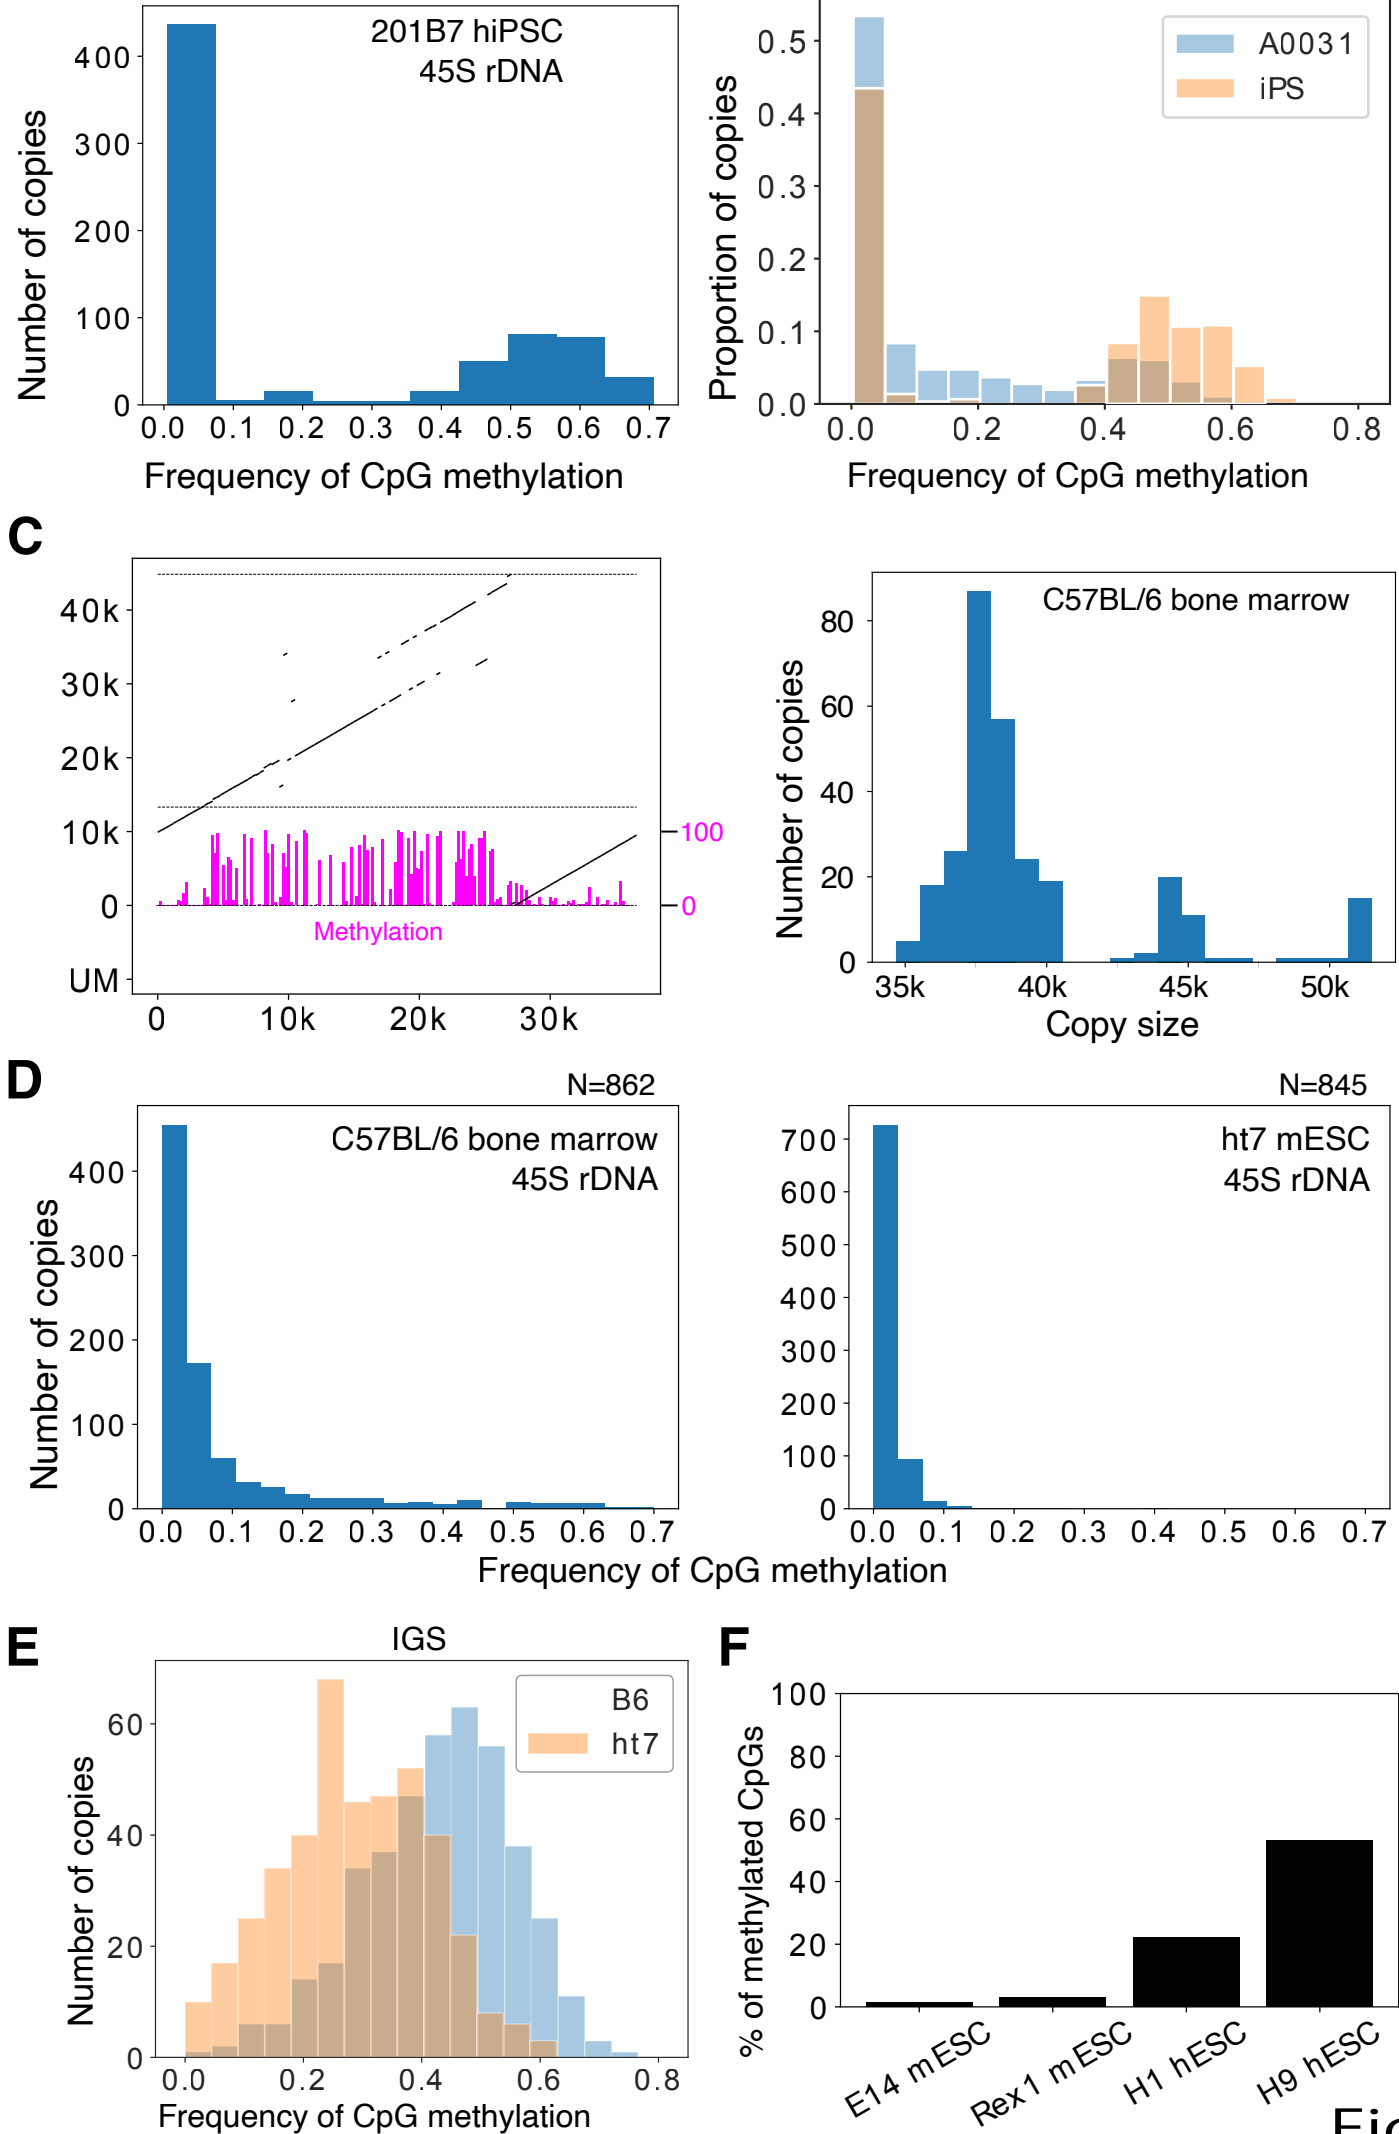

Fig.6

398

399

400

401

**Figure 6. rDNA methylation of pluripotent stem cells.**

402

403

404

405

406

407

408

409

410

411

412

413

414

415

(A) The 45S rDNA methylation status of rDNA in hiPSCs does not differ from that in other differentiated samples: ~40% of the transcribed region is methylated. (B) Comparison of the 45S rDNA methylation status in Werner syndrome patient fibroblasts (A0031) and iPSCs derived from them. The y axis is the proportion of reads in each bin. The frequency of methylated copies is increased in iPSCs. (C) Representative rDNA from a Cas9-enriched Nanopore read of a mouse sample (left panel). Magenta bars represent CpG methylation. The estimated size distribution of mouse rDNA copies in C57BL/6 bone marrow cells is shown on the right. Note that the rDNA copy size of mouse is much smaller than previously reported. (D) 45S rDNA methylation levels in B6 bone marrow cells and ht7 mESCs. Methylation levels among copies are more continuous in mice and almost no methylation is seen in mESCs. (E) Comparison of IGS methylation levels in B6 bone marrow cells and ht7 mESCs. ht7 clearly shows lower a methylation level, even in the IGS region. (F) Proportion of CpGs methylated in the 45S rDNA of mESCs and hESCs determined by using publicly available short-read bisulfite whole genome sequencing data. While both samples of mESCs show a very low level of methylation, a substantial proportion of CpGs are methylated in hESCs.

416

were clearly methylated but, unlike in human, the distribution of CpG methylation among copies was

417

continuous rather than bimodal, making it difficult to clearly define methylated copies (Fig. 6D left). The

418

IGS was also methylated in mouse, but the frequency of methylation was much lower in mESCs than in

419

hiPSCs (Fig. 6E). To examine whether the difference in methylation status between hiPSCs and mESCs was

420

the result of the derivation method (i.e., ES vs iPS) or related to species differences (i.e., human vs mouse),

421

we re-analyzed publicly available short-read-sequencer data, which showed that 45S rDNAs of mESCs are

422

rarely methylated but a substantial proportion of CpGs in hESCs are methylated (Fig. 6F). Thus, the

423

difference is likely to be ascribed to species variations. In fact, mESCs are known to be in a more

424

undifferentiated state as compared with hESCs and show global hypomethylation (Nichols and Smith 2009;

425

Nishino and Umezawa 2016).

426

427

**DISCUSSION**

428

In this study, we analyzed the long rDNA array using data from the Oxford Nanopore sequencer. Our

429

findings provide a new picture of the rDNA structure based on 39 samples with many reads that were

430

directly extracted from human cells (~78,000 copies, more than 3 billion bases).

431

By using a new method that visualizes multiple copies of rDNA, we first characterized the rate of

432

large-scale rDNA instability (inversion, deletion and other non-canonical structures) and found that such

433 mutations are relatively rare, contrary to a previous report based on the Fiber FISH method (Caburet et al.  
434 2005). We also showed that Oxford Nanopore sequencing occasionally produces artifactual palindromic  
435 reads that are considered to be difficult to distinguish from true palindromic reads (de Lannoy et al. 2018).  
436 Fortunately, we found such artificial palindromic reads have characteristic features, such as a poor quality  
437 score around the inversion and the position of the inversion site, and succeeded in recognizing them. As a  
438 result, we conclude that real palindromic structures are relatively rare. Lastly, we found that, although rDNA  
439 instability was not increased by age in our samples, it was increased in cells from patients with progeroid  
440 syndrome. In our study, ~40 samples were analyzed and only 0.2% (on average) of structures were non-  
441 canonical. This value is much lower (~1/30) than the value previously reported using Fiber FISH (Caburet et  
442 al. 2005). Thus, we conclude that the human rDNA is a relatively regular array.

443         We found that the R and Butterfly/Long repeat regions are variable in different copies, although they  
444 are similar in contiguous copies. Because the R and Butterfly/Long repeat regions have small repetitive  
445 sequences within the repeats, they may form a secondary DNA structure and inhibit the replication fork to  
446 induce instability. The R repeat contains many copies of the Sal box associated with TTF1 (Fig. 1A), which  
447 is known to arrest the replication fork both *in vivo* and *in vitro* (Santoro and Grummt 2005; Akamatsu and  
448 Kobayashi 2015). This sequence may work as a recombination hotspot, as observed in budding yeast  
449 (Supplemental Fig. S1; see below).

450         In contrast to variation, our study indicated that there is structural similarity between IGSs in  
451 contiguous copies. This suggests that gene conversion takes place frequently in the human rDNA, as in the  
452 budding yeast rDNA (Ganley and Kobayashi 2011). Previous studies also have suggested the possibility of  
453 IGS homogenization within the same chromosome (Gonzalez and Sylvester 2001). Our study strongly  
454 supports this view.

455         We also found that IGS are classified into two types among individuals (Fig. 3B; Supplemental Fig.  
456 S3). The mechanism behind this bimodal distribution of Butterfly/Long repeat copy number is a fascinating  
457 issue to be addressed in future studies. Another mystery is the presence of a rare type of IGS, which was  
458 observed in many samples. If the efficiency of gene conversion is high, such copies should be excluded. One  
459 explanation for the rare-type IGS is that these variations are often generated by chance and resolved over  
460 time by homogenization.

461 In the budding yeast, it is known that gene conversion occurs frequently and all copies essentially  
462 have the same sequence in a cell (Ganley and Kobayashi 2007). As a mechanism, Fob1/RFB-dependent  
463 rDNA recombination seems to be important (Ganley and Kobayashi 2011). As mentioned above, such an  
464 RFB site is also present in the R repeat in human rDNA. Therefore, a similar recombination repair system  
465 may also contribute to sequence homogenization in human cells (Akamatsu and Kobayashi 2015). Moreover,  
466 in progeroid syndrome patient cells, in which the activity of DNA repair is reduced, the number of non-  
467 canonical copies increased. Such rDNA instability has been also observed in the yeast WRN homologue  
468 mutant *sgs1* (Sinclair and Guarente 1997).

469 In terms of rDNA methylation, we found that there is an obvious difference between methylated and  
470 unmethylated 45S rDNAs (Fig. 5A,B). In unmethylated 45S rDNAs, the methylation rate was close to 0 such  
471 that the genes are likely to be transcribed (reviewed in Kass et al., 1997). The methylation status was also  
472 similar in contiguous copies. This may be because heterochromatin forms around these regions and affects  
473 rDNA silencing. In contrast to the “all-or-none” methylation pattern of 45S rDNAs, the non-coding IGS  
474 regions were always methylated, and the level was correlated with the methylation level of the contiguous  
475 45S rDNAs (Fig. 5D). These observations suggest that the IGS is always in a similar heterochromatin  
476 structure and that 45S rDNA activation affects the region. We also have to note that, because all of the IGS  
477 regions in the rDNA are heavily methylated, the transcriptional rate of non-coding sequences in these regions  
478 may not be very high. Therefore, if this is the case, at least some non-coding transcripts are like to come  
479 from rDNA fragments that are scattered all over the human genome (Cherlin et al. 2020).

480 We found that unmethylated copies are negatively correlated with total rDNA copy number in a cell,  
481 suggesting that the number of unmethylated copies is roughly constant in different individuals, at least in the  
482 same tissue. This finding also supports our definition of unmethylated copies and our view that they are the  
483 actively transcribed ones. One possible mechanism behind the regulation of active copy number is that the  
484 transcription factor dosage is limited. Alternatively, the volume of the nucleolus fibrillar center may be kept  
485 at a constant level, which restricts the number of rDNA copies that can be held inside. Further analysis will  
486 be required to reveal the underlying mechanism.

487 In terms of mouse rDNA, we found that some features were similar to the human rDNA, such as  
488 repeat number variation in the IGS. One clear finding was that the unit length was shorter (~39 kb) than

489 reported previously (~45 kb) (Grozdanov et al. 2003). The reason might be the difficulty in assembling  
490 sequences filled with repeats using relatively short reads.

491 Lastly, regarding the methylation in ES and iPS cells, the results differed between human and mouse.  
492 We expected that both cell types would be less methylated than their differentiated counterparts because the  
493 nucleolus of ES and iPS cells is known to be larger and rRNA transcription activity is high (Woolnough et  
494 al. 2016; Gupta and Santoro 2020; Wang and Lemos 2019). In the human iPSC and ESCs, however, the  
495 methylation status of the 45S rDNA was similar to that in differentiated cells. In contrast, most of the 45S  
496 rDNA copies in the mouse ESCs were unmethylated. This difference between mouse and human is thought  
497 to stem from the difference between their developmental stages. Mouse ESCs are always in a pre-X-  
498 chromosome-inactivated status and are globally hypomethylated; in human ESCs, by contrast, the X-  
499 chromosome is already inactivated in many cases and the other genomic regions are also highly methylated  
500 (Tomoda et al. 2012; Nishino and Umezawa 2016; Nichols and Smith 2009).

501 In summary, our results have revealed several new aspects of the most highly transcribed house-  
502 keeping gene, rDNA, in terms of its stability, structure, and methylation status.

503

## 504 **METHODS**

### 505 **DNA extraction**

506 DNA was extracted by modified Sambrook and Russell DNA extraction. In brief,  $1 \times 10^6$  cells were pelleted  
507 and 500  $\mu\text{L}$  of TLB was added (10 mM Tris-Cl pH 8.0, 25 mM EDTA pH 8.0, 0.5% (w/v) SDS, 20  $\mu\text{g}/\text{ml}$   
508 RNase A). After mixing by inversion and incubating for 1 hour at 37  $^{\circ}\text{C}$ , 1  $\mu\text{L}$  of 20  $\text{mg}/\text{ml}$  Proteinase K  
509 (Roche) solution was added and the mixture was further incubated for 3 hours at 55  $^{\circ}\text{C}$ . Next, 500  $\mu\text{L}$  of TE-  
510 saturated phenol was added and the solution was rotated until the water phase was clear. Phase lock gel (Dow  
511 Corning(R) High Vacuum Grease) was added, followed by centrifugation for 5 min, and then the upper phase  
512 was decanted into a 1.5-mL tube. Phenol/chloroform/isoamyl alcohol (25:24:1) was added and the above  
513 procedure was repeated. The resultant solution was placed in a 5-mL tube, and 200  $\mu\text{L}$  of 5 M ammonium  
514 acetate and 1.5 mL of 100% ethanol were added with gentle rotation at RT until the solution was  
515 homogeneous. The DNA precipitate was collected by pipetting and placed in a 1.5 mL tube containing 70%  
516 ethanol. After centrifugation, 50  $\mu\text{L}$  of TE was added to the pellet, which was left overnight at 4  $^{\circ}\text{C}$ . DNA  
517 concentration was measured with a Qubit assay kit (Invitrogen).



518

## 519 **Construction of the Cas9-enriched Oxford Nanopore library**

520 The published protocol (Gilpatrick et al. 2020) was modified specifically for rDNA, which consists of  
521 hundreds of copies. First, Cas9 RNP was assembled as described previously. Then, 500 ng of DNA was  
522 dissolved in 9  $\mu$ L of 1  $\times$  CutSmart buffer (New England Biolabs) and sheared by pipetting 30 times with a  
523 pipette set at 8  $\mu$ L with a P2/P10 tip. One microliter of QuickCIP (New England Biolabs) was added and the  
524 solution was incubated at 37  $^{\circ}$ C for 10 min, followed by 80  $^{\circ}$ C for 2 min. Next, 0.5  $\mu$ L of RNP, 0.3  $\mu$ L of 10  
525 mM dATP and 0.3  $\mu$ L of Taq DNA polymerase were added to the solution before incubation at 37  $^{\circ}$ C for 15  
526 min and 72  $^{\circ}$ C for 5 min. The ligation mix (5  $\mu$ L of LNB, 3  $\mu$ L of Quick ligase (New England Biolabs), 1.2  
527  $\mu$ L of MQ, 0.8  $\mu$ L of AMX) was then added to the DNA solution in two stages, with tapping to mix between  
528 additions. After incubating for 10 min at room temperature, 2.7  $\mu$ L of 5 M NaCl was added, followed by  
529 incubation for 5 min. After centrifuging at 15,000 rpm for 5 min, the supernatant was removed and 100  $\mu$ L of  
530 4.5% PEG 6000, 0.5 M NaCl, 5 mM Tris-HCl (pH 8.0) was added. After centrifuging again for 1 min, the  
531 supernatant was removed and the pellet was dissolved in 10  $\mu$ L of EB. In our experience, centrifugation with  
532 salt rather than Ampure beads resulted in a higher library yield and a shorter centrifugation time was  
533 preferable. It was extremely rare to find reads containing more than two copies of rDNA with this method,  
534 indicating that the in vitro Cas9 efficiency is sufficient. The four gRNA target sequences were 5'-  
535 ATGAACCGAACGCCGGGTAAAGG, 5'-AGGACGGTGGCCATGGAAGTCGG, 5'-  
536 ACCTCCACCAGAGTTTCCTCTGG and 5'-TATCCTGAGGGAAACTTCGGAGG.

537

## 538 **Mice**

539 Eight-week-old C57BL6/JJc1 mice were purchased from CLEA Japan, Inc (Tokyo, Japan). Bone marrow  
540 cells were extracted as described previously (Madaan et al. 2014). All experiments were approved by the  
541 Animal Experiment Ethics Committees of the University of Tokyo (Experiment No. 0210) and performed in  
542 accordance with the provided manual.

543

## 544 **Cell culture**

545 EBV-transformed B cells were obtained from National Institutes of Biomedical Innovation, Health and  
546 Nutrition. 201B7 hiPSCs were obtained from Riken BioResource Research Center. EBV-transformed B cells

547 were cultured as a floating culture in T25 flasks containing RPMI1640 supplemented with 10% FBS. hiPSCs  
548 were cultured on vitronectin-coated plates with AK02N medium. ht7 mESCs were cultured on 0.1% gelatin-  
549 coated plates with standard GMEM-based medium (10% FCS, 1xNEAA, 1 mM sodium pyruvate,  $10^{-4}$  M 2-  
550 ME, 1000 U/mL mLIF). A0031 Werner syndrome patient cells and the iPSCs derived from them were  
551 cultured as described previously (Shimamoto et al. 2014).

552

### 553 **Screening of rDNA-derived Oxford Nanopore reads**

554 To analyze the HPGP whole genome sequencing samples, we downloaded the fast5, fastq and sequencing  
555 summary files. First, based on the sequencing summary file, we excluded reads that did not pass the  
556 sequencing quality filtering. Next, each read was split and mapped to the rDNA reference file (KY962518.1)  
557 by using BWA MEM (v0.7.17) and the “ont2d” option. We only used reads that had more than 40,000 nt of  
558 continuous rDNA region at either end. Moreover, to remove reads derived from a microsatellite stretch  
559 similar to that included in the IGS of rDNA, we checked whether the reads contained at least 10% of split-  
560 reads that mapped to the coding region.

561

### 562 **Visualization of the rDNA-derived Oxford Nanopore reads**

563 Each fastq read was split into smaller reads of 300-nt, and mapped to the rDNA reference sequence by using  
564 BWA MEM (v0.7.17) as described above. The split-reads were then visualized as lines based on their  
565 position in the original read. To visualize the Phred quality score, the score was binned in 200-nt bins and the  
566 mean score was plotted. Visualization of CpG methylation was done similarly by binning reads in 200-nt  
567 bins. For each bin, the frequency of methylation was calculated based on the “average” (see below) and the  
568 value was plotted as a bar.

569

### 570 **Finding non-canonical copies**

571 First, the read was split and mapped to the rDNA reference sequence. If more than 10% of the mapped  
572 segment was in the opposite direction to the dominant direction, the read was classified as inverted and  
573 plotted. If the distance between each mapped read differed from the expected length by more than 500 nt, the  
574 reads were plotted as potential reads containing non-canonical copies. In case that both of two neighboring  
575 reads were within the R repeat or Butterfly/Long repeat region, we did not count them as aberrant copies

576 owing to the natural variation in these regions. Each plotted read was then manually classified based on the  
577 visualization.

578

### 579 **Estimation of repeat length**

580 Using BWA MEM software, 500-nt rDNA sections located at 10,000, 20,000 and 30,000 nt in the reference  
581 sequence were mapped to each read. Next, the distance between the mapped positions of 500-nt sections at  
582 10,000 and 20,000 in each read was used to estimate the R repeat length and the distance between the  
583 mapped positions of 20,000 and 30,000 was used to estimate the Butterfly/Long repeat length. Because  
584 genomic mutations in rDNA are rare, most of the variations obtained by this method should be due to repeat  
585 length variation in the repeat regions.

586

### 587 **Methylation analysis**

588 For the reads that were thought to contain rDNA, fast5 files were extracted by using `ont_fast5_api` and  
589 basecalled by using Guppy Basecaller v4.2.2 with `dna_r9.4.1_450bps_modbases_dam-dcm-cpg_hac_prom`  
590 configuration. For threshold-based methylation analysis, we used 0.8 as the threshold for posterior  
591 probability. In the HPGP database, there are two types of Nanopore data, which were generated by NHGRI-  
592 USCS and HPRC. For the analysis comparing transcribed-region methylation frequency and rDNA copy  
593 number, we used only data generated by HPRC because they were submitted to the database over a short  
594 period of time and thus were likely to be less affected by differences in experimental conditions. The number  
595 of samples available was sufficient for the analysis (23 samples).

596

### 597 **Whole genome bisulfite sequencing analysis**

598 Fastq files were first cleaned up with Trim Galore! (v0.6.6) to remove adapters (Martin 2011). The frequency  
599 of CpG methylation in the rDNA coding region was then estimated by Bismark software (v0.22.3) (Krueger  
600 and Andrews 2011) and Bowtie2 (v2.3.5) using the reference genome that contained only the rDNA coding  
601 region sequence. We used the following data: m14 mESC (SRR610046, SRA), Rex1 mESC (SRR5099302,  
602 SRA), H1 hESC (ENCFF311PSV, ENCODE project) and H9 hESC (ENCFF384QMG, ENCODE project).  
603 Files are available through SRA (<https://www.ncbi.nlm.nih.gov/sra/>) and ENCODE  
604 (<https://www.encodeproject.org/files/>), respectively.

605

## 606 DATA ACCESS

607 All of the raw Cas9-enriched data generated in this study have been uploaded to Mendeley Data

608 (<https://dx.doi.org/10.17632/h48hj39bpm.1>, <https://dx.doi.org/10.17632/2wdg439sx4.1>,

609 <https://dx.doi.org/10.17632/m84pty74mk.1>).

610

## 611 COMPETING INTEREST STATEMENT

612 The authors declare that they have no conflict of interest.

613

## 614 ACKNOWLEDGEMENTS

615 We thank the members of Kobayashi lab for their useful discussion. This work was supported by AMED-

616 CREST under grant number JP20gm1110010 to T.K.

617

## 618 REFERENCES

619 Agrawal S, Ganley ARD. 2018. The conservation landscape of the human ribosomal RNA gene repeats.

620 *PLoS One* **13**: 1–31.

621 Akamatsu Y, Kobayashi T. 2015. The Human RNA Polymerase I Transcription Terminator Complex Acts as

622 a Replication Fork Barrier That Coordinates the Progress of Replication with rRNA Transcription

623 Activity. *Mol Cell Biol* **35**: 1871–1881.

624 Burkhalter MD, Sogo JM. 2004. rDNA enhancer affects replication initiation and mitotic recombination:

625 Fob1 mediates nucleolytic processing independently of replication. *Mol Cell* **15**: 409–421.

626 Caburet S, Conti C, Schurra C, Lebofsky R, Edelstein SJ, Bensimon A. 2005a. Human ribosomal RNA gene

627 arrays display a broad range of palindromic structures. *Genome Res* **15**: 1079–1085.

628 Carrero D, Soria-Valles C, López-Otín C. 2016. Hallmarks of progeroid syndromes: Lessons from mice and

629 reprogrammed cells. *DMM Dis Model Mech* **9**: 719–735.

630 Cherlin T, Magee R, Jing Y, Pliatsika V, Loher P, Rigoutsos I. 2020. Ribosomal RNA fragmentation into

631 short RNAs (rRFs) is modulated in a sex- and population of origin-specific manner. *BMC Biol* **18**: 1–

632 19.

633 de Lannoy C, Ridder D De, Risse J. 2018. The long reads ahead : de novo genome assembly using the

634 MinION. *F1000Research* **6**: 1–26.

- 635 Defossez P-A, Prusty R, Kaeberlein M, Lin S-J, Ferrigno P, Silver PA, Keil RL, Guarente L. 1999.  
636 Elimination of Replication Block Protein Fob1 Extends the Life Span of Yeast Mother Cells. *Mol Cell*  
637 **3**: 447–455. doi:[https://doi.org/10.1016/S1097-2765\(00\)80472-4](https://doi.org/10.1016/S1097-2765(00)80472-4).
- 638 Gangloff S, Zou H, Rothstein R. 1996. Gene conversion plays the major role in controlling the stability of  
639 large tandem repeats in yeast. *EMBO J* **15**: 1715–1725.
- 640 Ganley ARD, Kobayashi T. 2007. Highly efficient concerted evolution in the ribosomal DNA repeats: total  
641 rDNA repeat variation revealed by whole-genome shotgun sequence data. *Genome Res* **17**: 184–191.
- 642 Ganley ARD, Kobayashi T. 2011. Monitoring the rate and dynamics of concerted evolution in the ribosomal  
643 DNA repeats of *Saccharomyces cerevisiae* using experimental evolution. *Mol Biol Evol* **28**: 2883–2891.
- 644 Ganley ARD, Kobayashi T. 2014. Ribosomal DNA and cellular senescence: new evidence supporting the  
645 connection between rDNA and aging. *FEMS Yeast Res* **14**: 49–59.
- 646 Gilpatrick T, Lee I, Graham JE, Raimondeau E, Bowen R, Heron A, Downs B, Sukumar S, Sedlazeck FJ,  
647 Timp W. 2020. Targeted nanopore sequencing with Cas9-guided adapter ligation. *Nat Biotechnol* **38**:  
648 433–438.
- 649 Gonzalez IL, Sylvester JE. 2001. Human rDNA: Evolutionary patterns within the genes and tandem arrays  
650 derived from multiple chromosomes. *Genomics* **73**: 255–263.
- 651 Grozdanov P, Georgiev O, Karagyozov L. 2003. Complete sequence of the 45-kb mouse ribosomal DNA  
652 repeat: Analysis of the intergenic spacer. *Genomics* **82**: 637–643.
- 653 Grummt I, Rosenbauer H, Niedermeyer I, Maier U, Öhrlein A. 1986. A repeated 18 bp sequence motif in the  
654 mouse rDNA spacer mediates binding of a nuclear factor and transcription termination. *Cell* **45**: 837–  
655 846.
- 656 Gupta S, Santoro R. 2020. Regulation and Roles of the Nucleolus in Embryonic Stem Cells: From Ribosome  
657 Biogenesis to Genome Organization. *Stem Cell Reports* **15**: 1206–1219.
- 658 Kaeberlein M, McVey M, Guarente L. 1999. The SIR2/3/4 complex and SIR2 alone promote longevity in  
659 *Saccharomyces cerevisiae* by two different mechanisms. *Genes Dev* **13**: 2570–2580.
- 660 Kass SU, Landsberger N, Wolffe AP. 1997. DNA methylation directs a time-dependent repression of  
661 transcription initiation. *Curr Biol* **7**: 157–165.
- 662 Killen MW, Stults DM, Adachi N, Hanakahi L, Pierce AJ. 2009. Loss of Bloom syndrome protein  
663 destabilizes human gene cluster architecture. *Hum Mol Genet* **18**: 3417–3428.
- 664 Kim JH, Dilthey AT, Nagaraja R, Lee HS, Koren S, Dudekula D, Wood WH, Piao Y, Ogurtsov AY, Utani  
665 K, et al. 2018. Variation in human chromosome 21 ribosomal RNA genes characterized by TAR  
666 cloning and long-read sequencing. *Nucleic Acids Res* **46**: 6712–6725.
- 667 Kobayashi T. 2008. A new role of the rDNA and nucleolus in the nucleus - rDNA instability maintains  
668 genome integrity. *BioEssays* **30**: 267–272.

- 669 Kobayashi T. 2011. Regulation of ribosomal RNA gene copy number and its role in modulating genome  
670 integrity and evolutionary adaptability in yeast. *Cell Mol Life Sci* **68**: 1395–1403.
- 671 Kobayashi T. 2014. Ribosomal RNA gene repeats, their stability and cellular senescence. *Proc Japan Acad*  
672 *Ser B Phys Biol Sci* **90**: 119–129.
- 673 Kobayashi T. 2003. The Replication Fork Barrier Site Forms a Unique Structure with Fob1p and Inhibits the  
674 Replication Fork. *Mol Cell Biol* **23**: 9178–9188.
- 675 Kobayashi T, Ganley ARD. 2005. Recombination regulation by transcription-induced cohesin dissociation in  
676 rDNA repeats. *Science (80- )* **309**: 1581–1584.
- 677 Kobayashi T, Heck DJ, Nomura M, Horiuchi T. 1998a. Expansion and contraction of ribosomal DNA  
678 repeats in *Saccharomyces cerevisiae*: requirement of replication fork blocking (Fob1) protein and the  
679 role of RNA polymerase I. *Genes Dev* **12**: 3821–3830.
- 680 Kobayashi T, Heck DJ, Nomura M, Horiuchi T. 1998b. Expansion and contraction of ribosomal DNA  
681 repeats in *Saccharomyces cerevisiae*: Requirement of replication fork blocking (Fob1) protein and the  
682 role of RNA polymerase I. *Genes Dev* **12**: 3821–3830.
- 683 Kobayashi T, Horiuchi T, Tongaonkar P, Vu L, Nomura M. 2004. SIR2 regulates recombination between  
684 different rDNA repeats, but not recombination within individual rRNA genes in yeast. *Cell* **117**: 441–  
685 453.
- 686 Krueger F, Andrews SR. 2011. Bismark: A flexible aligner and methylation caller for Bisulfite-Seq  
687 applications. *Bioinformatics* **27**: 1571–1572.
- 688 Li H. 2013. Aligning sequence reads, clone sequences and assembly contigs with BWA-MEM. *arXiv* **00**: 1–  
689 3.
- 690 Madaan A, Verma R, Singh AT, Jain SK, Jaggi M. 2014. A stepwise procedure for isolation of murine bone  
691 marrow and generation of dendritic cells. *J Biol Methods* **1**: 1.
- 692 Malinovskaya EM, Ershova ES, Golimbet VE, Porokhovnik LN, Lyapunova NA, Kutsev SI, Veiko NN,  
693 Kostyuk S V. 2018. Copy number of human ribosomal genes with aging: Unchanged mean, but  
694 narrowed range and decreased variance in elderly group. *Front Genet* **9**: 306.
- 695 Martin M. 2011. Cutadapt removes adapter sequences from high-throughput sequencing reads.  
696 *EMBnet.journal* **17**: 10.
- 697 Miga KH, Koren S, Rhie A, Vollger MR, Gershman A, Bzikadze A, Brooks S, Howe E, Porubsky D,  
698 Logsdon GA, et al. 2020. Telomere-to-telomere assembly of a complete human X chromosome. *Nature*  
699 **585**: 79–84.
- 700 Nichols J, Smith A. 2009. Naive and Primed Pluripotent States. *Cell Stem Cell* **4**: 487–492.
- 701 Nishino K, Umezawa A. 2016. DNA methylation dynamics in human induced pluripotent stem cells. *Hum*  
702 *Cell* **29**: 97–100.

- 703 Niwa H, Miyazaki JI, Smith AG. 2000. Quantitative expression of Oct-3/4 defines differentiation,  
704 dedifferentiation or self-renewal of ES cells. *Nat Genet* **24**: 372–376.
- 705 Parks MM, Kurylo CM, Dass RA, Bojmar L, Lyden D, Vincent CT, Blanchard SC. 2018. Variant ribosomal  
706 RNA alleles are conserved and exhibit tissue-specific expression. *Sci Adv* **4**: eaao0665.
- 707 Petes TD. 1979. Yeast ribosomal DNA genes are located on chromosome XII. *Proc Natl Acad Sci U S A* **76**:  
708 410–4.
- 709 Roussel P, André C, Comai L, Hernandez-Verdun D. 1996. The rDNA transcription machinery is assembled  
710 during mitosis in active NORs and absent in inactive NORs. *J Cell Biol* **133**: 235–246.
- 711 Saka K, Ide S, Ganley ARD, Kobayashi T. 2013. Cellular senescence in yeast is regulated by rDNA  
712 noncoding transcription. *Curr Biol* **23**: 1794–1798.
- 713 Santoro R, Grummt I. 2005. Epigenetic Mechanism of rRNA Gene Silencing: Temporal Order of NoRC-  
714 Mediated Histone Modification, Chromatin Remodeling, and DNA Methylation. *Mol Cell Biol* **25**:  
715 2539–2546.
- 716 Schawalder J, Paric E, Neff NF. 2003. Telomere and ribosomal DNA repeats are chromosomal targets of the  
717 bloom syndrome DNA helicase. *BMC Cell Biol* **4**.
- 718 Shafin K, Pesout T, Lorig-Roach R, Haukness M, Olsen HE, Bosworth C, Armstrong J, Tigyi K, Maurer N,  
719 Koren S, et al. 2020. Nanopore sequencing and the Shasta toolkit enable efficient de novo assembly of  
720 eleven human genomes. *Nat Biotechnol* **38**: 1044–1053.
- 721 Shimamoto A, Kagawa H, Zensho K, Sera Y, Kazuki Y, Osaki M, Oshimura M, Ishigaki Y, Hamasaki K,  
722 Kodama Y, et al. 2014. Reprogramming suppresses premature senescence phenotypes of Werner  
723 syndrome cells and maintains chromosomal stability over long-term culture. *PLoS One* **9**: 1–13.
- 724 Sinclair DA, Guarente L. 1997. Extrachromosomal rDNA Circles— A Cause of Aging in Yeast. *Cell* **91**:  
725 1033–1042.
- 726 Takeuchi Y, Horiuchi T, Kobayashi T. 2003. Transcription-dependent recombination and the role of fork  
727 collision in yeast rDNA. *Genes Dev* **17**: 1497–1506.
- 728 Tomoda K, Takahashi K, Leung K, Okada A, Narita M, Yamada NA, Eilertson KE, Tsang P, Baba S, White  
729 MP, et al. 2012. Derivation conditions impact X-inactivation status in female human induced  
730 pluripotent stem cells. *Cell Stem Cell* **11**: 91–9.
- 731 van Sluis M, van Vuuren C, Mangan H, McStay B. 2020. NORs on human acrocentric chromosome p-arms  
732 are active by default and can associate with nucleoli independently of rDNA. *Proc Natl Acad Sci U S A*  
733 **117**: 10368–10377.
- 734 Wang M, Lemos B. 2019. Ribosomal DNA harbors an evolutionarily conserved clock of biological aging.  
735 *Genome Res* **29**: 325–333.

- 736 Watada E, Li S, Hori Y, Fujiki K, Shirahige K, Inada T, Kobayashi T. 2020. Age-Dependent Ribosomal  
737 DNA Variations in Mice. *Mol Cell Biol* **40**.
- 738 Weitao T, Budd M, Hoopes LLM, Campbell JL. 2003. Dna2 helicase/nuclease causes replicative fork  
739 stalling and double-strand breaks in the ribosomal DNA of *Saccharomyces cerevisiae*. *J Biol Chem*  
740 **278**: 22513–22522.
- 741 Woolnough JL, Atwood BL, Liu Z, Zhao R, Giles KE. 2016. The regulation of rRNA gene transcription  
742 during directed differentiation of human embryonic stem cells. *PLoS One* **11**: 1–18.
- 743
- 744
